1 **Exposure of mammary cells to lipid activates gene expression changes associated with ER-**  
2 **negative breast cancer via chromatin remodeling**

3

4 **Short title: Lipids, ER-negative breast cancer and chromatin**

5

6 Shivangi Yadav<sup>1</sup>, Ranya Virk<sup>2</sup>, Carolina H Chung<sup>3</sup>, David Van Derway<sup>2</sup>, Duoqiao Chen<sup>7</sup>, Kirsten  
7 Burdett<sup>8</sup>, Hongyu Gao<sup>7</sup>, Zexian Zeng<sup>9</sup>, Manish Ranjan<sup>1</sup>, Gannon Cottone<sup>1</sup>, Xiaoling Xuei<sup>7</sup>, Sriram  
8 Chandrasekaran<sup>3,4,5,6</sup>, Vadim Backman<sup>2</sup>, Robert Chatterton<sup>10</sup>, Seema Ahsan Khan<sup>1\*</sup>, Susan E  
9 Clare<sup>1\*</sup>

10 <sup>1</sup>Department of Surgery, Feinberg School of Medicine, Northwestern University, Chicago, IL  
11 60611, USA.

12 <sup>2</sup> Department of Biomedical Engineering, Northwestern University, Evanston, IL 60208-2850,  
13 USA.

14 <sup>3</sup>Department of Biomedical Engineering, University of Michigan, Ann Arbor, MI 48109, USA.

15 <sup>4</sup> Program in Chemical Biology, University of Michigan, Ann Arbor, MI 48109, USA.

16 <sup>5</sup> Rogel Cancer Center, University of Michigan Medical School, Ann Arbor, MI 48109, USA.

17 <sup>6</sup> Center for Computational Medicine and Bioinformatics, University of Michigan, Ann Arbor, MI  
18 48109, USA.

19 <sup>7</sup>Center of for Medical Genomics, Indiana University School of Medicine, Indianapolis, IN 46202,  
20 USA.

21 <sup>8</sup> Department of Preventive Medicine, Northwestern University, Chicago, IL 60611, USA.

22 <sup>9</sup>Department of Data Sciences, Dana Farber Cancer Institute, Harvard T.H. Chan School of  
23 Public Health, Boston, MA 02215, USA.

24 <sup>10</sup> Department of Obstetrics and Gynecology, Northwestern University Feinberg School of  
25 Medicine, Chicago, IL 60611, USA.

26

27 \*To whom correspondence should be addressed:

28

29 Susan E Clare, MD, PhD

30 Research Associate Professor, Department of Surgery

31 Feinberg School of Medicine, Northwestern University

32 Robert H Lurie Medical Research Center Room 4-105

33 250 E Superior, Chicago, IL 60611

34 Email: [susan.clare@northwestern.edu](mailto:susan.clare@northwestern.edu)

35 Tel: 312-926-3021

36

37 Seema A Khan, MD

38 Professor, Department of Surgery

39 Feinberg School of Medicine, Northwestern University

40 NMH/Prentice Women's Hospital Room 4-420

41 250 E Superior, Chicago, IL 60611

42 Email: s-khan2@northwestern.edu

43 Tel: 312-503-4236

44

45 **Abstract**

46 Improved understanding of local breast biology that favors the development of estrogen receptor  
47 negative (ER-) breast cancer (BC) would foster better prevention strategies. We have previously  
48 shown that overexpression of specific lipid metabolism genes is associated with the development  
49 of ER- BC. We now report results of exposure of MCF-10A cells and mammary organoids to  
50 representative medium- and long-chain polyunsaturated fatty acids. This exposure caused a  
51 dynamic and profound change in gene expression, accompanied by changes in chromatin packing  
52 density, chromatin accessibility and histone posttranslational modifications (PTMs). We  
53 identified 38 metabolic reactions that showed significantly increased activity, including reactions  
54 related to one-carbon metabolism. Among these reactions are those that produce S-adenosyl-L-  
55 methionine for histone PTMs. Utilizing both an *in-vitro* model and samples from women at high  
56 risk for ER- BC, we show that lipid exposure engenders gene expression, signaling pathway  
57 activation, and histone marks associated with the development of ER- BC.

58

59

## 60 **Introduction**

61 Breast cancer is a heterogeneous disease with different molecular subtypes that are characterized,  
62 at a minimum, by the expression of the estrogen receptor (ER), progesterone receptor (PR) and  
63 Human epidermal growth factor receptor 2 (HER2)/neu (1). Although multiple statistical tools  
64 have been developed to quantify breast cancer risk (2), they do not predict breast cancer subtypes.  
65 Current breast cancer prevention with selective estrogen receptor modulators (SERM) and  
66 aromatase inhibitors decreases the risk of estrogen-receptor (ER) positive breast cancer sub-types,  
67 but not those without ER expression (3-5). Thus, determining the etiologic/biologic factors that  
68 favor the development of ER-negative breast cancer will potentially enable the development of  
69 both strategies to identify women at risk for ER-negative disease as well as targeted preventive  
70 and therapeutic agents.

71 Given the poor understanding of the genesis of sporadic ER-negative breast cancer, we set out to  
72 study this using the contralateral, unaffected breast of patients with unilateral breast cancer as a  
73 model. Studies of metachronous contralateral breast cancer show a similarity in the ER status of  
74 the contralateral cancer to the index primary (6-8). Therefore, the contralateral unaffected breast  
75 (CUB) of women undergoing surgical therapy for newly diagnosed unilateral breast cancer can be  
76 employed as a model to discover potential markers of subtype-specific risk. In a previous study,  
77 we performed Illumina expression arrays on epithelial cells from the CUB of breast cancer  
78 patients, and identified a lipid metabolism (LiMe) gene signature which was enriched in the CUBs  
79 of women with ER- breast cancer (9). Among these are genes that control critical steps in lipid and  
80 energy metabolism. We validated this signature in an independent set of 36 human samples and  
81 re-confirmed the above results in fresh frozen tissues obtained from a new set of ER+ and ER-  
82 breast cancer patients, each time using laser capture microdissection (LCM) to obtain epithelial

83 cells from tumor and CUB samples (10). Again, we found significantly higher expression of LiMe  
84 genes in CUBs from women with ER- breast cancer, compared to both CUBs from women with  
85 ER+ breast cancer, and breast epithelium from a control group of women undergoing reduction  
86 mammoplasty. However, the specific genes comprising this overexpressed set had no specific  
87 function or group of functions in common and did not suggest specific mechanistic explanations  
88 as to why lipid metabolism pathways would aid ER- breast cancer development. In the present  
89 study, we address possible mechanistic explanations for our previous observations.

90 Cellular metabolism is a complex sequence of reactions in response to a cell's microenvironment  
91 that have profound effects on cellular function (11). Major reprogramming of cellular energetics  
92 is one of two emerging hallmarks of cancer (11). Metabolic re-wiring is required to provide the  
93 energy required to enable continuous growth and proliferation of the cancer cells. The past century  
94 has witnessed intensive investigation of metabolic pathways in cancer, in particular that of aerobic  
95 glycolysis commonly called as the Warburg effect (12). However, this is not the singular anomaly  
96 in the metabolically altered cancer cell. In addition to glucose and glutamine, fatty acids are an  
97 extremely important energy source (13). Altered lipid metabolism is posited to be a driver of  
98 carcinogenesis in various cancers, including ovarian (14), prostate (15, 16), liver (17) and triple  
99 negative breast cancer (18, 19). Increased lipid metabolism has also been shown to serve as a  
100 survival signal that enables tumor recurrence and has been suggested as an Achilles heel for  
101 combating breast cancer progression (20). Despite this recognition of the importance of fatty acid  
102 metabolism, its role of in the transformation of a normal cell to the malignant state is largely  
103 unknown. Metabolomic studies of the concentrations of several free fatty acids in primary breast  
104 tumors, including linoleate, palmitate, and oleate, as a function of breast cancer subtype have  
105 revealed significant differences across the subtypes, with the highest concentrations in basal-like

106 breast cancer (21). Conjugation of long-chain fatty acids to carnitine for transport into the  
107 mitochondria and subsequent fatty acid oxidation (FAO) was observed to be highest in basal-like  
108 breast cancers, followed by luminal B ~HER2-enriched, with luminal A tumors displaying the  
109 lowest levels (21). Another study, which utilized Raman spectroscopy to interrogate tissue,  
110 revealed that histologically normal breast tissue centimeters removed from the breast malignancy  
111 have significantly higher polyunsaturated fatty acid levels compared with normal tissue from  
112 cancer-free subjects (22).

113 Metabolites from intermediate metabolism are the substrates used to generate chromatin  
114 modifications, underlining a complex relationship between metabolism and epigenetics. Key to  
115 the crosstalk between metabolism and chromatin structure, is that the kinetic and thermodynamic  
116 properties of the chromatin modification reactions are commensurate with the dynamic range of  
117 the physiological concentrations of the corresponding intermediates in metabolism (23). For  
118 example, the substrates for histone methylation and acetylation reactions often have cellular  
119 concentrations that are commensurate with enzyme  $K_m$  values, and thus are sensitive and  
120 responsive to changes in metabolism. Historically, glucose-derived carbon has been considered  
121 the primary source of acetyl-coA for histone acetylation. In the nucleus, acetate may be a minor  
122 source. Recently, however, data from McDonnell and colleagues has revealed that lipids  
123 reprogram metabolism to become a major carbon source for histone acetylation (24). This  
124 reprogramming was shown to have significant effects on gene expression. Therefore, we sought  
125 to determine if the LiMe signature we observed in the CUBs of ER- patients is associated with  
126 chromatin modifications and histone PTMs secondary to changes in metabolism fostered by  
127 exposure to medium and long chain fatty acids.

## 128 Results

### 129 Lipid facilitates transcriptional reprogramming in non-transformed mammary cells

130 We established an *in vitro* model by exposing estrogen and progesterone receptor (PR) negative  
131 MCF10A cells to octanoate, a medium chain eight-carbon fatty acid. Due to its small size and  
132 lipophilic nature octanoate does not depend on fatty acid transport proteins to traverse cell  
133 membranes and is readily oxidized in the mitochondria to form acetyl-CoA (25, 26). We performed  
134 RNA-seq to determine the effects of octanoate treatment on gene expression in the MCF10A cells.  
135 RNA-seq analysis revealed that 24 hours of octanoate treatment produces a transcriptional profile  
136 that is completely distinct from vehicle-treated controls (**Fig. 1A, Fig. S1A-B**). Genes with  
137 initially low expression (negative values of  $\ln(E_{ctrl}/E_{ctrl,avg})$ ) are upregulated (corresponding to  
138 positive values of  $\ln(E_{oct}/E_{ctrl})$ ) while genes with initially high expression (positive values of  
139  $\ln(E_{ctrl}/E_{ctrl,avg})$ ) are downregulated upon octanoate treatment (corresponding to negative  
140 values of  $\ln(E_{oct}/E_{ctrl})$ )(27). More specifically, there is a clear trend for initially highly  
141 expressed genes in the control condition to be downregulated upon octanoate treatment while  
142 genes with initial low expression in the control condition were upregulated. Differential expression  
143 analysis revealed a total of 2132 upregulated and 632 downregulated genes (FDR=0.01) in the  
144 octanoate treated cells (**Supplementary Fig. 1C**). Pathway enrichment analysis of the  
145 differentially expressed genes induced by the 5mM octanoate treatment was performed and the top  
146 25 upregulated and downregulated pathways are shown in Fig. 1B. Specifically, this analysis  
147 revealed that among the top altered biological processes are second messenger mediated signaling,  
148 the Notch signaling pathway, adenylate cyclase-activating adrenergic receptor signaling, cell  
149 morphogenesis and differentiation. In contrast, downregulated genes are involved in cell cycle  
150 processes, transcriptional regulation of tumor suppressor genes such as p53, and cell cycle

151 checkpoints (**Fig. 1B**). Additional gene set enrichment analysis (GSEA) investigating top  
152 pathways with coordinated upregulation or downregulation of genes demonstrated that the top  
153 pathways associated with octanoate treatment included positive regulation of cell morphogenesis,  
154 a process involved in differentiation, as well as several oncogenic pathways associated with breast  
155 tumorigenesis, including *ERBB*, *WNT*, and *NOTCH* signaling pathways (**Fig. 1C**). Subsequent  
156 leading-edge analysis of these top upregulated signaling pathways- Lipid storage pathways (I),  
157 Wnt pathway (II), Notch signaling (III) and ERBB pathway (IV) shows clear association of core  
158 enrichment genes with octanoate treatment across replicates (**Fig. 1D**). Network analysis of  
159 octanoate-associated pathways identified by GSEA analysis revealed linked clusters involved with  
160 the nervous system and a second, separate group of linked clusters involved with growth factor  
161 stimulation, regulation of the *MAPK* cascade, and *ERBB* signaling (**Fig. 1E**). Finally, using real-  
162 time qPCR we validated the expression of a number of genes that GSEA analysis determined were  
163 significantly upregulated with octanoate treatment (**Fig. 1F**). Thus, treatment with medium chain  
164 fatty acids induces significant changes in transcription (28).

165 **Evaluating the lipid composition of the serum of ER- and ER+ BC patients** Next, we  
166 investigated whether dietary lipids, which are mainly long chain fatty acids (LCFAs), have a  
167 similar effect on the gene transcriptional profile to that of MCF10A cells. In order to determine  
168 the specific lipid(s) to evaluate experimentally, we sought to determine the differences in the  
169 percent composition of lipid species as a function of ER expression in serum from patients who  
170 had donated CUB samples for our original studies (9, 10). A comprehensive lipid profile of these  
171 serum samples was performed by the Northwest Metabolic Research Center at University of  
172 Washington, with measurement of more than 700 lipids. For each of the measurements, the  
173 association between the measured value and ER status was evaluated using regression models,



174 adjusting for BMI, age, and menopausal status. ER was a categorical variable used to describe  
175 subjects having ER + or ER – cancers, or controls undergoing reduction mammoplasty. As the  
176 purpose of this experiment was to identify a lipid for ensuing experiments, lipid species were  
177 ranked for effect size comparing serum from patients subjects with ER- disease to those with ER+  
178 disease. Three of the top four lipid species with the largest effect size were noted to contain  
179 linoleic acid: cholesterol ester (CE) 18:2, phosphatidyl choline (PC)16:0/18:2 and triacylglycerol  
180 (TAG) 54:6-FA18:2. Linoleic acid as a free fatty acid ranked 11<sup>th</sup> in the analysis. Linoleic acid is  
181 the most highly consumed polyunsaturated fatty acid in the human diet (29), its presence in serum  
182 CE has been strongly correlated with intake (30), and its concentration in adult adipose tissue has  
183 more than doubled in the past half century (31). Therefore, all subsequent studies were carried out  
184 using linoleic acid (LA).

### 185 **Linoleic acid influences chromatin packing behavior**

186 The state of chromatin is intimately linked with the regulation of gene transcription, undergoing  
187 dynamic changes between transcriptionally active and inactive states. Thus, our next step was to  
188 explore the changes in chromatin structure of fatty acid treated MCF10A cells by employing partial  
189 wave spectroscopic (PWS) microscopy, which quantifies chromatin packing scaling ( $D$ ) in live  
190 cells (32).  $D$  represents the power-law scaling relationship between the 1-D size of the chromatin  
191 polymer i.e. the number of nucleotides and the 3-D space the chromatin polymer occupies. Recent  
192 evidence indicates that higher chromatin packing scaling is associated with increased intercellular  
193 and intra-network transcriptional heterogeneity as well as increased malignancy and  
194 chemoresistance in cancer cells (27, 33, 34). PWS was used to evaluate the effect of LA on  
195 chromatin packing scaling in live MCF10A cells. Images were obtained every 6 hours over a 24-  
196 hour period. Our results showed significant increases in chromatin packing scaling upon exposure

197 to LA, in a manner similar to that of octanoate, suggesting that there is an increase in the dynamic  
198 range of gene expression and transcriptional gene network heterogeneity following lipid treatment  
199 (**Fig. 2A-B**). Thus, LA treatment results in changes in chromatin packing structure which are  
200 associated with a more malignant phenotype. Such significant changes in chromatin packing  
201 behavior also indicate significant changes in chromatin accessibility, which is directly associated  
202 with chromatin structure (35).

203 **ATAC Sequencing reveals increased chromatin accessibility in regulatory regions of genes**  
204 **in the MAPK and cAMP signaling pathways in lipid treated mammary cells** To acquire more  
205 detailed insight into the specific regions of open chromatin that were made accessible by LA  
206 treatment, we proceeded with ATAC sequencing on LA treated MCF-10A cells. We examined  
207 the genomic locations of ATAC-seq peaks, representing open chromatin sites, and discovered  
208 1704 open chromatin sites. Open chromatin regions were overrepresented within 1 kb of  
209 transcription start sites (TSSs) by 40-fold relative to the whole genome (**Fig. 2C**). Further, KEGG  
210 pathway analysis revealed 326 open chromatin regions with a log fold change  $\geq 1.5$  and FDR  $<$   
211 0.05 compared to vehicle treated cells. Among the top pathways that were upregulated  
212 significantly upon LA treatment are MAPK signaling pathway, PI3K-AKT signaling pathway, and  
213 the cAMP adenylate cyclase pathway. Additionally, motif analysis conducted using  
214 ‘HOMER’(36) showed that chromatin regions made accessible/inaccessible by LA treatment have  
215 binding motifs for a number of transcription factors (**Fig. 2E**). These data reveal that linoleic acid  
216 affects chromatin heterogeneity and increases/decreases the accessibility of specific regions that  
217 include transcription factor binding sites.

218 **Notch pathway genes are overexpressed in patients at high risk of ER- disease**

219 Next, we sought to determine whether the genes, or sets of genes/pathways that we identified in  
220 our *in vitro* study were also differentially expressed *in vivo* in tissue of patients at risk for ER- and  
221 ER+ breast cancer. We took advantage of RNA from the contralateral unaffected breast (CUB) of  
222 breast cancer cases utilized in our previous studies, which revealed the association of LiMe genes  
223 in the CUBs of women with unilateral ER- breast cancer (9, 10). We combined the data from the  
224 RNA and ATAC sequencing experiments and collated a list of 44 genes of interest and 3  
225 housekeeping genes. The list consists of the genes from the *HEDGEHOG*, *NOTCH*, *WNT*, *EMT*,  
226 *PPAR $\gamma$*  and adenylate cyclase pathways (**supplementary file S1**). TaqMan low density arrays  
227 were utilized to measure expression of these genes in CUBs of ER- and ER+ cases compared with  
228 the reduction controls. The study population included 84 women, with participants comprised of  
229 28 matched triplets of women with ER-positive breast cancer, ER-negative breast cancer, and  
230 reduction mammoplasty controls. The three groups were matched by age, race and menopausal  
231 status as shown in **Fig. S2A**. As noted in our original publication, ANOVA revealed a significant  
232 difference in BMI across the three groups with BMI in the reduction mammoplasty control group  
233 ( $30.0 \pm 5.8$ ) notably higher than in ER-negative cases ( $25.3 \pm 6.3$ ,  $p=0.015$ ), but not significantly  
234 higher than in the ER-positive group ( $26.7 \pm 5.5$ ,  $p= 0.136$ ) (10). There was no significant  
235 difference in HER2 status between ER-positive and ER-negative cases. The majority of the  
236 selected genes had higher expression in high risk CUB specimens than the controls, irrespective  
237 of the ER status of the index tumor (**Fig. S2B**). The comparison between the ER- and ER+ CUBs  
238 revealed that in the ER- CUBS there is increased expression of genes that function in the Notch  
239 pathway: *NOTCH1* (1.7-fold,  $p=0.002$ , BH\_adjP=0.07), *NOTCH4* (1.7-fold,  $p=0.04$ ,  
240 BH\_adjP=0.3), *DLL4* (2.5-fold,  $p=0.7$ , BH\_adjP=0.8) and *HEY 1* (1.5-fold,  $p=0.05$ ,  
241 BH\_adjP=0.3), in addition to the *SMO* gene (1.47-fold,  $p= 0.05$ , BH\_adjP=0.3), which is a key

242 component of the hedgehog signaling pathway (**Fig. 3**). Altogether, these data reveal upregulation  
243 in *NOTCH* signaling in benign breast tissue samples from women at risk for ER- disease,  
244 suggesting that dysregulation of these pathways may play a role in the early stages of ER- cancer  
245 development.

246 **LA increases the expression of Notch pathway genes and specific genes involved in fatty acid**  
247 **oxidation *in vitro*** The increased expression of Notch pathway genes we discovered in the ER-  
248 CUBs, along with the similar findings in MCF10A cells exposed to octanoate (described above),  
249 led us to test the hypothesis that long chain fatty acids have similar effects on gene expression.  
250 We therefore investigated whether an increased LA environment influences the expression of  
251 Notch pathway genes and specific genes involved with fatty acid oxidation *in vitro*. We treated  
252 MCF-10A cells and mammary organoids from reduction mammoplasty patient samples with LA  
253 for 24 hours and then quantified changes in gene expression using RT-qPCR. To begin with, we  
254 assayed the genes involved in the activation of fatty acid oxidation. Upon entering cells, free fatty  
255 acids are converted into a fatty acyl-CoA molecules by the enzymes of the acyl-CoA synthetase  
256 (ACS) family (37). Notably, acyl-CoA synthetase long chain (*ACSL3*) is one of the LiME genes  
257 found to be upregulated in high risk ER- CUBs samples. Generation of acetyl-CoA occurs through  
258 a cyclical series of reactions in which a fatty acid is shortened by two carbons per cycle, eventually  
259 generating acetyl co-A. Acetyl co-A is a substrate for ketogenesis, which is initiated by the  
260 mitochondrial enzyme 3-hydroxy-3-methylglutaryl-CoA synthase 2 (*HMGCS2*), another of the  
261 previously identified LiMe genes. The mechanism for LCFAs oxidation is slightly more complex  
262 than for MCFAs, as this is regulated primarily via the enzyme carnitine palmitoyltransferase 1  
263 (*CPT1*), the rate limiting enzyme of FAO which enables transport into the mitochondria. As shown  
264 in **Fig. 4A**, the expression of *HMGCS2*, *ACSL3*, and *CPT1B* were increased by LA exposure in

265 MCF-10A cells and mammary organoids. Additionally, we observed a significant increase in  
266 *DLL4* expression followed by *HEY1*, *HEY2* and *NOTCH1* in the lipid treated mammary cells (**Fig.**  
267 **4A**). We revisited the ATAC sequencing data to examine the effect of LA on chromatin  
268 architecture near key genes in the *DLL4/NOTCH* signaling pathway, and observed increased  
269 accessibility around the transcription start sites of *DLL4*, *NOTCH1* and *HEY1* showing significant  
270 lowered chromatin density with p-values of 1.62e-17, 0.017 and 0.03 respectively (**Fig. 4B & Fig.**  
271 **C**).

272  
273 **Fatty acids drive flux through metabolic reactions resulting in increased histone methylation**

274 While most of the experiments reported by McDonnell et al. were performed in AML 12 liver  
275 cells, these investigators also demonstrated increased H3K9 acetylation in octanoate-exposed  
276 MCF7 and MDAMB-231 breast cancer cells (24). Therefore, we sought to determine if these same  
277 experimental conditions would lead to H3K9 acetylation in a non-malignant MCF-10A cells. We  
278 exposed MCF-10A non-transformed ER - breast epithelial cell line to 5mM octanoate (C8) for 24  
279 hours in medium containing both glucose (1.441 g/L) and glutamine (0.292 g/L). Western blot  
280 analysis demonstrated that octanoate exposure of MCF-10As resulted in increased acetylation at  
281 both H3K9 and H3K14 (**Fig. 5A**). To demonstrate that this was a fatty acid-specific effect, we  
282 treated the cells with 1,4-Cyclohexanedimethanol (1,4-CHDM), an alcohol with the same formula  
283 as octanoate; no acetylation was observed consequent to the alcohol exposure (**Fig. S3A**). To  
284 validate the specificity of the antibody against the acetylated histone lysines, we treated MCF-10A  
285 cells with sodium butyrate, a histone deacetylase (HDAC) inhibitor. Sodium butyrate treatment  
286 increased the acetylation of H3K9 and H3K14 as shown in **Fig. S3B**.

287 To exhaustively explore the impact of octanoate treatment on metabolic pathways, we used flux  
288 balance analysis (FBA) (38). FBA makes use of genome-scale metabolic network models that

289 contain all known metabolic reactions in a cell or tissue based on evidence from the published  
290 literature (39). Genome-scale metabolic models have been widely used to predict the metabolic  
291 behavior of various mammalian cell types (40-44). Here we used the Recon1 human network  
292 model that maps the relationship between 3744 reactions, 2766 metabolites, 1496 metabolic genes,  
293 and 2004 metabolic enzymes (45). This model was augmented with biochemical reactions  
294 corresponding to histone acetylation and methylation (40, 46), allowing us to predict the  
295 consequences of octanoate-induced metabolic changes on histone modifications by tracking the  
296 flux through the substrates for the histone modifications. These models were previously used to  
297 predict bulk histone acetylation levels in various cell lines based on the nuclear flux of acetyl-coA  
298 directed towards histone acetylation (46). Similarly, bulk histone methylation levels can be  
299 predicted based on the nuclear flux of S-adenosyl-L-methionine (SAM) (40). The model predicted  
300 octanoate treatment would result in increased histone methylation levels, with a more modest  
301 increase in histone acetylation levels (**Fig. 5C**). As a comparison, we repeated this analysis with  
302 immortalized hepatocyte cells used by McDonnell *et al*; they found a significant increase in histone  
303 acetylation after octanoate treatment (24). We calculated metabolic flux in these hepatocytes using  
304 the transcriptomics data from McDonnell *et al* and found a much larger increase in histone  
305 acetylation after octanoate treatment (**Fig. S3C**). These results suggest that the impact of metabolic  
306 alterations on histone acetylation is cell-type specific, as observed in prior studies (47, 48). Overall,  
307 out of the 3759 reactions in the model, we identified 38 that showed significant increased activity  
308 after octanoate treatment (p-value < 0.01; **Fig. S3C**). As expected, reactions involved in lipid and  
309 fatty acid metabolism, specifically triacyl glycerol synthesis and glycerophospholipid metabolism  
310 were upregulated. Interestingly, among the up-regulated reactions were several reactions related  
311 to the one-carbon metabolic pathway, which links folate, SAM, methionine, glycine and serine

312 metabolism (**Fig. 5D**). The reactions methionine adenosyltransferase, methionine synthase,  
313 adenosyl homocysteinase, 5,10-methylene-tetrahydrofolatereductase, glycine N-  
314 methyltransferase, and formyltetrahydrofolate dehydrogenase were all predicted to have increased  
315 activity after treatment (p-value < 0.01). Increased activity of the one-carbon pathway is associated  
316 with increased H3K4 trimethylation in stem cells and cancer cell lines (40, 49). These reactions  
317 likely support increased histone methylation by providing one carbon units.

318 **Lipid exposure eventuates in histone methylation.** In order to profile the specific histone marks  
319 significantly changed by the octanoate treatment we performed liquid chromatography/mass  
320 spectrometry on tryptic peptides isolated from the nuclei of treated and control MCF10A cells.  
321 Increased methylation was observed in various histone proteins including H3K9me1/2/3,  
322 H3.1K27me2/3, H3.3K36me2/3, H3K79me1/2 and H3K4 (**Fig. 5F**) together with increased  
323 acetylation of H3K14 and H4K16 (Fig. 5E). Notably, the GSEA analysis showed a significant  
324 correlation of H3K27 methylation (NES = 2.47, FDR q-value =0.05) and H3K4 methylation  
325 (NES= 1.24, FDR q-value = 0.1) with octanoate treatment (**Fig. S3 D-E**) suggesting this lipid rich  
326 environment eventuates in histone methylation in mammary epithelial cells.

## 327 **Discussion**

328 The known determinants of risk for ER-negative breast cancer are genetic (either specific racial  
329 inheritance, germline mutations in genes such as BRCA1) or systemic/behavioral factors  
330 (premenopausal obesity (50), absence of a breastfeeding (51)). In contrast, few if any local factors  
331 in the breast environment serve to identify women at risk for ER negative tumors. Local in-breast  
332 factors are of great interest however, since they may be more specifically targetable for breast  
333 cancer prevention than systemic factors. Of note, the two strongest risk factors for breast cancer  
334 overall (other than high penetrance germline mutations) are local: atypical proliferative lesions ,

335 and (52) extremely dense breast tissue (53) . This reasoning motivated us to investigate the local  
336 breast biology that may promote the development of ER negative rather than ER positive breast  
337 cancer, using the contralateral unaffected breast (CUB) of women undergoing surgery for a  
338 unilateral primary breast cancer as a model for ER-specific breast cancer risk (7, 54). In our initial  
339 study, we identified a highly correlated lipid metabolism (LiMe) gene signature, which was  
340 enriched in the CUBs of women with ER- breast cancer.

341 To explain the biologic basis for this association, we developed an *in vitro* model wherein we  
342 exposed either MCF10A, an ER negative, non-tumorigenic epithelial cell line, or breast organoids  
343 derived from reduction mammoplasty samples to an extracellular milieu rich in medium or long  
344 chain fatty acids. This model system has now enabled us to demonstrate that the exposure of  
345 breast epithelial cells to these fatty acids results in a dynamic and profound change in gene  
346 expression, accompanied by changes in chromatin packing density, chromatin accessibility and  
347 histone PTMs. The histone modifications, in turn, are the result of both the lipid-engendered  
348 increased expression of the requisite enzymes and the increased production of their substrates. Our  
349 metabolic flux analysis revealed the upregulation of several reactions related to the one-carbon  
350 metabolic pathway, which links folate, SAM, methionine, glycine and serine metabolism. This  
351 insight was not evident upon analysis of differential gene expression, which is not surprising as  
352 gene expression changes often do not reflect the flux of metabolic reactions (40).

353 Our proteomics data reveal increased methylation at H3K27me<sub>2/3</sub>, H3K36me<sub>3</sub> and H3K9me<sub>2/3</sub>  
354 in cells treated with octanoate; GSEA analysis showed that genes with ontologies related to histone  
355 methylation at H3K27 and H3K4 exhibit changes in expression in the lipid-treated cells.  
356 Methylation of H3K27 is carried out by *EZH2*, which showed a 1.65-fold increase in expression



357 (p=0.001) following exposure to octanoate. *EZH2* expression is sensitive to the level of oxidative  
358 phosphorylation. Our metabolic flux data demonstrated increased oxidative phosphorylation  
359 following exposure to octanoate; specifically flux through the electron transport chain (ETC).  
360 Inhibition of oxidative phosphorylation via complex I of the ETC by the biguanide phenformin  
361 markedly reduces *EZH2* and *SUZ12* protein expression (55). This suggests that increased H3K27  
362 methylation may be a consequence of increased flux through the ETC increasing *EZH2* expression  
363 in concert with increased production of its substrate SAM. Several studies have revealed a  
364 significant association of *EZH2* overexpression with ER negative breast cancer (56) or ER negative  
365 luminal progenitor cell expansion (57). *EZH2* is the enzymatic subunit of Polycomb Repressive  
366 Complex 2, which catalyzes the trimethylation of H3K27. However, *EZH2*'s actions are not be  
367 limited to its methyltransferase activity. *EZH2* has been shown to bind to the *NOTCH 1* promoter  
368 resulting in increased *NOTCH1* transcription, stem cell expansion and accelerated tumor initiation  
369 (58). The effect of *NOTCH1* expression on mammary cell-lineage fate determination was  
370 recognized shortly after the identification of the mammary stem cell (59). Mammary stem cell  
371 differentiation is a hierarchical organization, and lineage tracing experiments have determined that  
372 *NOTCH1* expression exclusively generates ER- luminal cells (60). A subsequent study by these  
373 investigators revealed that during mammary embryogenesis Notch signaling prevents the  
374 generation of basal precursors, and cells expressing active *NOTCH1* exclusively give rise to the  
375 ER- (*Sca1*-/*CD133*-) lineage at any developmental stage from mouse embryonic day 13.5 to  
376 postpartum day 3 (61). Even more interesting given our focus on the origins of ER negative breast  
377 cancer was their observation that pubertal cells retain plasticity. Ectopic activation of Notch1 in  
378 basal cells at puberty was able to completely switch their identity to ER negative luminal cells.

379 Additional clues regarding the association of our experimental findings with ER negative breast  
380 cancer comes from GWAS data. A study that included 21,468 ER-negative cases and 100,594  
381 controls identified independent associations of ten single nucleotide polymorphisms (SNPs) with  
382 the development of ER- breast cancer (62). Pathway analysis was performed by mapping each  
383 SNP to the nearest gene. This identified several pathways implicated in susceptibility to ER-  
384 negative, but not ER+ breast cancer. Included among these was the adenylylase (AC)  
385 activating pathway. One of the significantly altered biologic processes that we identified by RNA  
386 sequencing of the octanoic acid treated cells is adenylylase-activating adrenergic receptor  
387 signaling. Adenylylase signals via cyclic AMP. Regions of chromatin with increased  
388 accessibility are associated with increased gene expression; our ATAC-Seq results show that  
389 linoleic acid exposure significantly increased accessibility to genes in the cAMP signaling  
390 pathway. In their discussion of ER- GWAS results, Milne et al. suggest that stimulation of the beta  
391 2 adrenergic-adenylylase-cAMP- $\beta$ -arrestin-Src-ERK pathway may play a role in the genesis  
392 of ER- breast cancer. MetaCore analysis of our RNA-sequencing data reveals similar pathway  
393 activation, however, it is the beta1 adrenergic receptor that demonstrates increased expression in  
394 the octanoate treated cells. In addition, our ATAC-seq data showed increased RAP1 signaling  
395 pathway accessibility. Adenylylase signaling also functions via Epac-Rap1-B-raf-MEK-  
396 ERK, with this signaling shown to be responsible for sustained *ERK* activation that occurs at a  
397 later time points (10-30 minutes) after cAMP activation (63). The MAPK (ERK) pathway can be  
398 stimulated by means other than adrenergic receptor ligand binding. Activation of this pathway by  
399 overexpression of *EGFR+EGF*, *c-erbB-2*, *RAF1* or *MEK* in MCF7 cells leads to estrogen-  
400 independent growth and down-regulation of ER $\alpha$  expression (64). These results suggest that  
401 hyperactivation of the MAPK(ERK) pathway plays a role in the generation of the ER- phenotype

402 in breast cancer. We observed *MAPK* activation in our analysis of differentially expressed genes,  
403 i.e., “positive regulation of the *MAPK* cascade,” and in the analysis of regions of chromatin with  
404 significantly increased chromatin.

405 Using stratified LD score regression, a statistical method for identifying functional enrichment  
406 from GWAS summary statistics, SNPs associated with the H3K4me3 histone mark were  
407 determined to be contributing to the heritability of ER-negative breast cancer, (2.4-fold,  $P =$   
408 0.0005) (62). Increased activity of the one-carbon pathway is associated with increased H3K4  
409 trimethylation in stem cells and cancer cell lines (40, 49). Restriction of methionine with  
410 consequent modulation of SAM and S-Adenosyl-L-homocysteine (SAH) levels affects  
411 methylation at H3K4me3, H3K27me3 and H3K9me3, with H3K4me3 exhibiting the largest  
412 changes (45). Interestingly, this restriction leads to loss of H3K4me3 at the promoters of colorectal  
413 cancer (CRC)-associated genes, with resulting decreased expression ( $p = 0.02$ , Fisher’s exact test).  
414 A computational model developed to identify the direct influences on methionine concentrations  
415 in humans suggests that dietary intake explains about 30% of the variation in methionine  
416 concentration, and fats (arachidic acid in this model) are among the foods contributing to higher  
417 methionine levels (49).

418 One-carbon metabolism has multiple other functions in addition to producing SAM; one of which  
419 is to maintain redox homeostasis by producing NADPH. One of the earliest steps in breast  
420 tumorigenesis is the filling of the duct/acinar lumen with malignant cells. The viability of ECM-  
421 detached cells is dependent on combating the generation of reactive oxygen species (ROS) (65).  
422 For example, shuttling flux through the pentose phosphate pathway (PPP) promotes NADPH  
423 production and consequent reduction of ECM detachment-induced reactive oxygen species. It  
424 appears, however, that the process that produces the reducing equivalent is immaterial as cells can

425 also utilize NADPH-regenerating enzymes in the folate pathway as in metastasizing melanoma  
426 (66). Therefore, the one-carbon metabolism initiated by FAs may facilitate early tumorigenesis  
427 and the survival of matrix detached cells by the production of NADPH.

428 In conclusion, we have demonstrated in the present study that exposure of breast epithelial cells *in*  
429 *vitro* to fatty acids results in epigenetic effects that produce dynamic and profound changes in the  
430 expression of genes that have been associated with the development of ER- breast cancer. Next  
431 steps include demonstrating that these same changes are observed *in vivo*. As mentioned in the  
432 introduction, polyunsaturated fatty acids are present in normal breast tissue. Although we  
433 measured lipid species in the serum of the donors of the CUB specimens, fatty acids can also be  
434 mobilized from adjacent adipose tissue; adipocytes have been shown to be a reservoir of lipids for  
435 breast cancer stem cells (67). We hypothesize that the expression of genes associated with the  
436 development of ER- breast cancer is consequent to lipid stimulation of one-carbon metabolism  
437 with resultant changes in histone methylation. Important roles for glycolysis, glutaminolysis,  
438 lipogenesis and mitochondrial activity have been demonstrated in oncogenesis; the one-carbon  
439 pathway has comparatively received less attention and the insights we provide here generate new  
440 questions regarding lipid metabolism and ER negative breast cancer, to be pursued in future  
441 investigations.

## 442 **Materials and Methods**

### 443 **Cell culture**

444 MCF10A cell line was obtained from American Type Culture Collection (ATCC) and cultured in  
445 mammary epithelial cell growth basal medium with single quotes supplements and growth factors  
446 (#Lonza CC-4136). Cells were treated with the medium-chain fatty acids (Sigma) sodium

447 octanoate (C8) dissolved in PBS, and long-chain fatty acids (Sigma) Linoleic acid (C18)  
448 complexed with fatty acid free BSA (Roche 10775835001). PBS and BSA were used as the vehicle  
449 control in experiments containing C8 and C18 respectively. Cells were counted using an Invitrogen  
450 Countess automated cell counter using Trypan blue exclusion method and seeded at the indicated  
451 densities. All experiments were done in complete MEBM media with fatty acids or vehicle.

## 452 **CUB Samples**

453 Patients diagnosed with unilateral breast cancer and undergoing contralateral prophylactic  
454 mastectomy at Prentice Women's Hospital of Northwestern Medicine were recruited under an  
455 approved protocol (NU11B04), with exclusions for neoadjuvant treatment, prior endocrine therapy  
456 or pregnancy/lactation during the prior 2 years. A group of reduction mammoplasty (RM) patients  
457 were also recruited as standard risk controls. The fresh tissues were frozen and stored in liquid  
458 nitrogen. Tissue samples from 56 bilateral mastectomy cases (28 ER+ and 28 ER-) and 28 healthy  
459 RM controls were used in this study. The ER+ cases, ER- cases and controls were matched by  
460 age, race, and menopausal status.

## 461 **Mammary Organoids Preparation**

462 Tissues were collected from the non-obese, premenopausal women coming for the reduction  
463 mammoplasty. Transfer the breast tissue to be processed into a sterile petri dish. Chop big breast  
464 tissue mass into small pieces. Transfer the minced tissue to a sterile 50ml tube and add 30ml of  
465 Kaighn's Modification media (Gibco #21127022) containing collagenase from Clostridium  
466 histolyticum (Sigma Aldrich, catalog no. C0130), final collagenase concentration is 1 mg/mL.  
467 Media containing collagenase is filtered using 0.22  $\mu$ m filter. The falcon is sealed with parafilm  
468 and tissue is gently dissociated on a shaker at 100 rpm and 37°C, overnight (16 hours). Following

469 day, organoids are collected by the centrifugation of the suspension at 800 rpm for 5 min. Discard  
470 the supernatant and wash the organoid pellet two-three times with PBS. Organoids with a size  
471 between 40-100µm are collected and resuspended in the fresh media (3mL) and added to a 6 well  
472 plate (Ultra-Low Attachment Surface plate, Corning # CLS3471). Organoids are allowed to  
473 stabilize for 24 hours before using it for the experiments.

#### 474 **Fatty acid preparation**

475 Sodium octanoate (C8) was dissolved in PBS. To bind linoleic acid (Sigma # L8134) to BSA, they  
476 were initially dissolved in water to yield a 50 mM final concentration. Dissolve 0.12g of BSA in  
477 1.2 ml of water resulting a 10% BSA solution. Combine 0.2 ml aliquot of the Na linoleate solution  
478 to the 10% BSA solution. After 15 min of slow stirring at 37°C, 0.6 ml of water was added to bring  
479 the final concentration of Na linoleate to 5 mMol/L (Pappas et al, 2001).

#### 480 **Lipid analysis**

481 LC-MS grade methanol, dichloromethane, and ammonium acetate were purchased from Fisher  
482 Scientific (Pittsburgh, PA) and HPLC grade 1-propanol was purchased from Sigma-Aldrich (Saint  
483 Louis, MO). Milli-Q water was obtained from an in-house Ultrapure Water System by EMD  
484 Millipore (Billerica, MA). The Lipidizer isotope labeled internal standards mixture consisting of  
485 54 isotopes from 13 lipid classes was purchased from Sciex (Framingham, MA).

#### 486 **Sample Preparation**

487 Frozen plasma samples were thawed at room temperature (25 °C) for 30 min, vortexed; 25 µL of  
488 plasma was transferred to a borosilicate glass culture tube (16 x 100 mm). Next, 0.475 mL of  
489 water, 1.45 mL of 1:0.45 methanol:dichloromethane, and 25 µL of the isotope labeled internal  
490 standards mixture were added to the tube. The mixture was vortexed for 5 sec and incubated at

491 room temperature for 30 min. Next, another 0.5 mL of water and 0.45 mL of dichloromethane  
492 were added to the tube, followed by gentle vortexing for 5 sec, and centrifugation at 2500 g at 15  
493 °C for 10 min. The bottom organic layer was transferred to a new tube and 0.9 mL of  
494 dichloromethane was added to the original tube for a second extraction. The combined extracts  
495 were concentrated under nitrogen and reconstituted in 0.25 mL of the mobile phase (10 mM  
496 ammonium acetate in 50:50 methanol:dichloromethane).

### 497 **Mass Spectrometry**

498 Quantitative lipidomics was performed with the Sciex Lipidyzer platform consisting of Shimadzu  
499 Nexera X2 LC-30AD pumps, a Shimadzu Nexera X2 SIL-30AC autosampler, and a Sciex  
500 QTRAP® 5500 mass spectrometer equipped with SelexION® for differential mobility  
501 spectrometry (DMS). 1-propanol was used as the chemical modifier for the DMS. Samples were  
502 introduced to the mass spectrometer by flow injection analysis at 8 uL/min. Each sample was  
503 injected twice, once with the DMS on (PC/PE/LPC/LPE/SM), and once with the DMS off  
504 (CE/CER/DAG/DCER/FFA/H CER/LCER/TAG). The lipid molecular species were measured  
505 using multiple reaction monitoring (MRM) and positive/negative polarity switching. Positive ion  
506 mode detected lipid classes SM/DAG/CE/CER/DCER/H CER/DCER/TAG and negative ion mode  
507 detected lipid classes LPE/LPC/PC/PE/FFA. A total of 1070 lipids and fatty acids were targeted  
508 in the analysis.

### 509 **Data Processing:**

510 Data was acquired and processed using Analyst 1.6.3 and Lipidomics Workflow Manager 1.0.5.0.  
511 For statistical analysis, we evaluated the lipid species enrichments in the ER+, ER-, and control  
512 groups. The different groups were compared in pair-wise and the log-fold changes of lipid

513 enrichment were derived, along with the effect sizes and p-values inferred from the regression  
514 models using the lipid measurement as an input variable and group information as the output  
515 variable.

#### 516 **Library preparation and RNA Sequencing:**

517 RNA was isolated with Qiagen RNeasy Plus Mini Kit (# 74134) as per the manufacturer's protocol.  
518 The concentration and quality of total RNA in samples were assessed using Agilent 2100  
519 Bioanalyzer. RNA Integrity Number (RIN) of the vehicle and octanoate sample was 9.9 and 9.8  
520 respectively. Sequencing libraries were prepared from a total of 100ng of RNA using KAPA RNA  
521 HyperPrep Kit. Single-Indexed adapters were obtained from KAPA (Catalog# KK8701). Library  
522 quality was assessed using the KAPA Library Assay kit. Each indexed library was quantified and  
523 its quality assessed by Qubit and Agilent Bioanalyzer, and 6 libraries were pooled in equal  
524 molarity. 5 $\mu$ L of 4nM pooled libraries were denatured, neutralized and a final concentration of 1.5  
525 pM of pooled libraries was loaded to Illumina NextSeq 500 for 75b single-read sequencing.  
526 Approximately 80M filtered reads per library was generated. A Phred quality score (Q score) was  
527 used to measure the quality of the sequencing. More than 88% of the sequencing reads reached  
528 Q30 (99.9% base call accuracy). Single-end FASTQ reads from RNA-seq measurements were  
529 aligned and mapped to hg38 ENSEMBL genome using STAR alignment (68).

#### 530 **Gene Ontology Analysis of Differentially Expressed Genes**

531  
532 Transcriptions per million (TPM) from mapped reads were estimated using RSEM from the STAR  
533 aligned reads (69). The *DESeq2* R package (70) was employed to determine differentially  
534 expressed genes for the octanoate treatment group compared to the vehicle-treated controls with  
535 FDR cutoff = 0.01 and  $|\log_2 FC| \geq 2$  to identify a reasonable number of differentially expressed



536 genes, on the order of several thousands of genes total, for subsequent analysis. Gene ontology  
537 pathway analysis for biological processes was performed on each set of differentially expressed  
538 genes using *Metascape* (71).

### 539 **GSEA Analysis**

540 Raw counts were first estimated using *HTSeq* from STAR aligned reads (72). Next, replicates for  
541 control cells and treated cells were merged and normalized using modules from the GenePattern  
542 software package (73). Gene set enrichment analysis (GSEA) (74, 75) was performed on these  
543 DESeq-normalized reads using annotations from online databases, including KEGG, Hallmark,  
544 Reactome, BioCarta, and Canonical Pathways. The normalized enrichment score (NES) of these  
545 top 20 pathways associated with the control and the octanoate-treated condition are shown with  
546 nominal p-value = 0.0. *Metascape* was employed to perform network analysis on these top 20  
547 pathways associated with each treatment condition.

### 548 **ATAC Seq Library preparation and sequencing**

549  $1 \times 10^6$  cells were pelleted and lysed in ATAC-resuspension buffer as described (76). Extracted  
550 nuclei was processed for TN-5 mediated tagmentation using the Illumina Tagment DNA Enzyme  
551 and buffer kit (Nextera Illumina # 20034210) : Transposon reaction mix as 2X TD Buffer-25  $\mu$ l,  
552 Tn5 Transposase – 2.5 $\mu$ l, 1X PBS containing nuclei- 16.5 $\mu$ l, 10% Tween-20- 0.5 $\mu$ l (Sigma #  
553 P9416), 1% Digitonin-0.5 $\mu$ l (Promega # G9441) and water at 37°C, 1000rpm for 30mins.  
554 Tagmented DNA was isolated by Nucleospin PCR clean-up (Takara Bio USA, Inc # 740609.250).  
555 Libraries were amplified for 8 cycles and purified using AMPure XP (Agencourt # A63880).  
556 Fragment sizes were determined using 106 LabChip GXII Touch HT (PerkinElmer), and 2 $\times$ 50  
557 paired-end sequencing performed on NovaSeq S1 6000 flow cell (Illumina) flow to yield 100M  
558 reads per sample.

## 559 **ATAC-seq data sequencing and peak calling**

560 Illumina adapter sequences and low-quality base calls were trimmed off the paired end reads with  
561 Trim Galore v0.4.3. Sequence reads were aligned to human reference genome hg38 using bowtie2  
562 with default settings. Duplicate reads were discarded with Picard. Reads mapped to mitochondrial  
563 DNA together with low mapping quality reads were excluded from further analysis. MACS2 was  
564 used to identify the peak regions with options -f BAMPE -g hs --keep-dup all -B -q 0.01. Peaks for  
565 samples in the same condition were merged using the function 'merge' of bedtools and peaks for  
566 samples in different conditions were intersected using the function of 'intersect' of bedtools.

## 567 **Differential chromatin accessibility analysis**

568 The number of cutting sites of each samples were counted using the script dnase\_cut\_counter.py  
569 of pyDNase. The raw count matrix was normalized by CPM. R package edgeR was used to conduct  
570 the differential accessibility analysis for all 66,853 common peaks. Significant different accessible  
571 chromatin regions under different conditions were defined as the threshold 0.05 for FDR. With the  
572 cutoff 1 for the absolute value of fold change, comparing treatment group with vehicle control  
573 group, we got 1,704 significant increased peaks and 3,340 significant decreased peaks.

## 574 **Motif analysis**

575 Motif analysis were conducted for significant changed chromatin regions using  
576 'findMotifsGenome.pl' script of HOMER with default settings. The principal component analysis  
577 was conducted to detect the important motifs using the relative enrichment of motifs. Biplot was  
578 used to visualize the principal component analysis results.

## 579 **Genomic distribution of open chromatin regions**

580 We calculated the overall genomic distribution of open chromatin regions, comparing the  
581 treatment to the vehicle, based on the methods as described (77). We used the hg38 refseq genes  
582 annotation from UCSC genome browser to define the genomic features. All TSSs were considered  
583 in the analysis if a gene had multiple TSSs. The formula for reported enrichment is  $(a/b)/(c/d)$ . a  
584 is the number of peaks overlapping a given genomic feature, b is the number of total peaks, c is  
585 the number of regions corresponding to the feature, and d is the estimated number of discrete  
586 regions in the genome where the peaks and feature could overlap. Specifically, d is equal to  
587  $(\text{genome size})/(\text{mean peak size} + \text{mean feature size})$ , following the implementation in the bedtools  
588 fisher.

#### 589 **Pathway analysis for open chromatin regions**

590 For the 326 open chromatin regions with  $\log_{2}FC \geq 1.5$  and  $FDR < 0.05$  comparing the treatment  
591 with the vehicle, we used R package ‘clusterProfile’ to conduct KEGG pathway analysis.

#### 592 **Validation of candidate genes qRT-PCR:**

593 Treated cells and organoids were washed with PBS and RNA was isolated with Qiagen RNeasy  
594 plus mini Kit (# 74134) as per the manufacturer’s protocol. cDNA was synthesized using the  
595 SuperScript VILO cDNA synthesis kit (#11755250). Real-time qPCR was performed using  
596 Applied biosystem Quant studio 5 real time PCR System (Thermo Scientific). Expression data of  
597 the studied genes was normalized to RPLP1 to control the variability in expression levels and were  
598 analyzed using the  $2^{-\Delta\Delta CT}$  method described by Livak and Schmittgen (78). TaqMan gene  
599 expression assays were purchased from ThermoFisher Scientific and the list of the assays is  
600 provided in supplemental file S1.

#### 601 **qRT-PCR based TaqMan low density array assays**

602 Based on histological diagnosis atypical hyperplasia benign breast epithelium was identified and  
603 captured by laser capture microdissection (LCM). RNA was isolated with Qiagen RNeasy plus  
604 mini Kit (# 74134) as per the manufacturer's protocol. RNA quality was checked for integrity  
605 using Bioanalyzer 2100 by Agilent. 100ng RNA was reverse transcribed using High Capacity  
606 RNA-to-cDNA Master Mix (#4388950) and preamplified for 14 cycles using TaqMan PreAmp  
607 Master Mix 2X((#4488593) and pooled assay mix for the genes in which we were interested. Pre-  
608 amplified cDNA were diluted to 1:20 with 1X TE buffer and mixed with Fast advanced master  
609 mix (# 4444965) Each sample was loaded in duplicate in 384- well microfluidic cards  
610 customized with 47 genes of interest including three housekeeping genes (GAPDH, RPLP0 and  
611 RPLP1). TaqMan assays with best coverage attribution were used for the TLDA study as  
612 recommended by the manufacturer. A list of the genes and the Assay ID for the primers obtained  
613 from ThermoFisher is provided in supplemental file S2. Real Time PCR reactions were carried  
614 out in Quant studio 7 Flex system for 40 cycles using comparative Ct ( $\Delta\Delta C_t$ ) method. Results were  
615 analyzed using Expression suite software.

#### 616 **Live cell PWS Imaging:**

617 Before treatment and imaging, MCF-10A cells were seeded in 6 wells black culture plate at least  
618 35% confluency and allowed to adhere overnight before the treatment with 500 $\mu$ M LA (C18:2)  
619 and 5mM Octanoate. We based the concentration of LA used in the experiment on the range in  
620 human plasma: 0.2 to 5.0 mmol/L (79). For chromatin study experiments, live-cell PWS images  
621 were acquired at room temperature (22 °C) and in trace CO<sub>2</sub> (open air) conditions. Imaging was  
622 performed using the commercial inverted microscope (Leica DMIRB) Hamamatsu Image-EM  
623 CCD camera C9100-13 coupled to a liquid crystal tunable filter (LCTF; CRi Woburn, MA) to  
624 acquire mono-chromatic spectrally resolved images that range from 500–700 nm at 1 nm intervals

625 produced by a broad band illumination provided by an Xcite-120 LED Lamp (Excelitas, Waltham,  
626 MA) as previously described (33, 34). Briefly, PWS measures the spectral interference resulting  
627 from internal light scattering structures within the cell, which captures the mass density  
628 distribution. To obtain the interference signal directly related to refractive index fluctuations in the  
629 cell, we normalized measurements by the reflectance of the glass medium interface, i.e., to an  
630 independent reference measurement acquired in an area without cells. PWS measures a data cube  
631 (spatial coordinates of a location within a cell and the light interference spectrum recorded from  
632 this location). The data cube then allow to measure spectral SD ( $\Sigma$ ), which is related to the spatial  
633 variations of refractive index within a given coherence volume. The coherence volume was defined  
634 by the spatial coherence in the transverse directions ( $\sim 200$  nm) and the depth of field in the axial  
635 direction ( $\sim 1$  mm). In turn, the spatial variations of refractive index depended on the local  
636 autocorrelation function (ACF) of the chromatin refractive index. Finite-difference time-domain  
637 simulations have shown that PWS is sensitive to ACF within the 20- to 200-nm range. According  
638 to the Gladstone-Dale equation, refractive index is a linear function of local molecular crowding.  
639 Therefore, S depends on the ACF of the medium's macromolecular mass density. Small molecules  
640 and other mobile crowdors within the nucleus are below the limit of sensitivity of PWS, and PWS  
641 is primarily sensitive to chromatin conformation above the level of the nucleosome. To convert S  
642 for a given location within a nucleus to mass fractal dimension D, we modeled ACF as a power  
643 law  $B_{\chi}(r) = \delta r^{\phi} \frac{1}{4} s^2 \phi r r m i \_ \_ D \_ 3$ , where  $\phi$  is the variance of CVC (60). In general, S is a sigmoidal  
644 function of D. However, for fractal structures such as a chromatin packing domain where within  
645 physiological range  $2 < D < 3$ , S can be approximated as a linear function of D by the relationship  
646  $D \approx D_0 + aS$ , where  $D_0 = 1.473$  and is comparable to the minimal fractal dimension that an  
647 unconstrained polymer can attain and constant  $a \sim 7.6$ . The measured change in chromatin packing

648 scaling between treatment conditions was quantified by first averaging D within each cell's  
649 nucleus and then averaging nuclei from over 100 cells per condition.

### 650 **Flux based analysis (FBA)**

651 We calculated the relative activity of reactions in MCF-10A cells by interpreting gene expression  
652 data using the Recon1 human metabolic model augmented with histone modifications (46, 80).  
653 We then identified a metabolic flux state that is most consistent with gene expression data in  
654 control and octanoate treatment. This was achieved by maximizing the activity of reactions that  
655 are associated with up-regulated genes and minimizing flux through reactions that are down-  
656 regulated in a condition, while simultaneously satisfying the stoichiometric and thermodynamic  
657 constraints embedded in the model using linear optimization (46, 80). The glucose, fatty acid, and  
658 glutamine levels in the simulations were adjusted based on the growth media used for culturing  
659 the cells. All p-values were corrected for multiple comparisons.

660

### 661 **Statistical analysis**

662 Prior to performing the analyses, the log<sub>2</sub>-transformed relative (log<sub>2</sub>RE) amounts of mRNA  
663 expression normalized to GAPDH and expressed as  $\log_2 2^{-(CtX - CtGAPDH)} = -(CtX - CtGAPDH)$  where  
664 Ct is threshold cycle. Mann-Whitney test was performed to identify genes with pairwise  
665 differences between ER+ and ER- samples. The analyses were adjusted for multiple testing, 34  
666 genes, using the Benjamini-Hochberg (BH) adjustment in order to control the false discovery rate  
667 at the two-sided 0.05 level. Boxplots were used to visualize differences in log<sub>2</sub>RE by group. The  
668 log<sub>2</sub>RE analyses were conducted using the R statistical environment [R] version 3.5.1.

### 669 **Supplementary Materials**

670 **S1 List of primers used for qRT-PCR validation of candidate genes.** List of Assay ID  
671 (ThermoFisher) of primers utilized in qRT-PCR of candidate genes (Fig. 4A).

672 **S2 List of genes assayed by TaqMan low density array (TLDA) and their corresponding**  
673 **primers.** List of genes and the corresponding Assay ID (ThermoFisher) of primers used for TLDA  
674 assays.

## 675 **References**

- 676 1. B. Weigelt, J. S. Reis-Filho, Histological and molecular types of breast cancer: is there a  
677 unifying taxonomy? *Nature reviews. Clinical oncology* **6**, 718-730 (2009).
- 678 2. M. H. Gail *et al.*, Projecting individualized probabilities of developing breast cancer for  
679 white females who are being examined annually. *J Natl Cancer Inst* **81**, 1879-1886 (1989).
- 680 3. B. Fisher *et al.*, Tamoxifen for prevention of breast cancer: report of the National Surgical  
681 Adjuvant Breast and Bowel Project P-1 Study. *J Natl Cancer Inst* **90**, 1371-1388 (1998).
- 682 4. J. Cuzick *et al.*, Long-term results of tamoxifen prophylaxis for breast cancer--96-month  
683 follow-up of the randomized IBIS-I trial. *J Natl Cancer Inst* **99**, 272-282 (2007).
- 684 5. J. Cuzick *et al.*, Use of anastrozole for breast cancer prevention (IBIS-II): long-term results  
685 of a randomised controlled trial. *Lancet* **395**, 117-122 (2020).
- 686 6. C. Bouchardy *et al.*, Risk of second breast cancer according to estrogen receptor status and  
687 family history. *Breast Cancer Res Treat* **127**, 233-241 (2011).
- 688 7. A. W. Kurian *et al.*, Second primary breast cancer occurrence according to hormone  
689 receptor status. *J Natl Cancer Inst* **101**, 1058-1065 (2009).
- 690 8. S. M. Swain *et al.*, Estrogen receptor status of primary breast cancer is predictive of  
691 estrogen receptor status of contralateral breast cancer. *J Natl Cancer Inst* **96**, 516-523  
692 (2004).
- 693 9. J. Wang *et al.*, Lipid metabolism genes in contralateral unaffected breast and estrogen  
694 receptor status of breast cancer. *Cancer prevention research (Philadelphia, Pa.)* **6**, 321-  
695 330 (2013).
- 696 10. J. Wang *et al.*, Overexpression of lipid metabolism genes and PBX1 in the contralateral  
697 breasts of women with estrogen receptor-negative breast cancer. *International journal of*  
698 *cancer* **140**, 2484-2497 (2017).
- 699 11. D. Hanahan, R. A. Weinberg, Hallmarks of cancer: the next generation. *Cell* **144**, 646-674  
700 (2011).
- 701 12. W. H. Koppenol, P. L. Bounds, C. V. Dang, Otto Warburg's contributions to current  
702 concepts of cancer metabolism. *Nat Rev Cancer* **11**, 325-337 (2011).
- 703 13. A. Carracedo, L. C. Cantley, P. P. Pandolfi, Cancer metabolism: fatty acid oxidation in the  
704 limelight. *Nat Rev Cancer* **13**, 227-232 (2013).
- 705 14. K. M. Nieman *et al.*, Adipocytes promote ovarian cancer metastasis and provide energy  
706 for rapid tumor growth. *Nature medicine* **17**, 1498-1503 (2011).

- 707 15. R. Mitra, T. T. Le, P. Gorjala, O. B. Goodman, Jr., Positive regulation of prostate cancer  
708 cell growth by lipid droplet forming and processing enzymes DGAT1 and ABHD5. *BMC*  
709 *cancer* **17**, 631 (2017).
- 710 16. K. B. Singh *et al.*, Prostate cancer chemoprevention by sulforaphane in a preclinical mouse  
711 model is associated with inhibition of fatty acid metabolism. *Carcinogenesis* **39**, 826-837  
712 (2018).
- 713 17. Huang *et al.*, HIF-1-mediated suppression of acyl-CoA dehydrogenases and fatty acid  
714 oxidation is critical for cancer progression. *Cell reports* **8**, 1930-1942 (2014).
- 715 18. R. Camarda *et al.*, Inhibition of fatty acid oxidation as a therapy for MYC-overexpressing  
716 triple-negative breast cancer. *Nature medicine* **22**, 427-432 (2016).
- 717 19. J. H. Park *et al.*, Fatty Acid Oxidation-Driven Src Links Mitochondrial Energy  
718 Reprogramming and Oncogenic Properties in Triple-Negative Breast Cancer. *Cell reports*  
719 **14**, 2154-2165 (2016).
- 720 20. K. M. Havas *et al.*, Metabolic shifts in residual breast cancer drive tumor recurrence. *J Clin*  
721 *Invest* **127**, 2091-2105 (2017).
- 722 21. V. Cappelletti *et al.*, Metabolic Footprints and Molecular Subtypes in Breast Cancer. *Dis*  
723 *Markers* **2017**, 7687851 (2017).
- 724 22. S. You *et al.*, Raman Spectroscopic Analysis Reveals Abnormal Fatty Acid Composition  
725 in Tumor Micro- and Macroenvironments in Human Breast and Rat Mammary Cancer. *Sci*  
726 *Rep* **6**, 32922 (2016).
- 727 23. M. A. Reid, Z. Dai, J. W. Locasale, The impact of cellular metabolism on chromatin  
728 dynamics and epigenetics. *Nat Cell Biol* **19**, 1298-1306 (2017).
- 729 24. E. McDonnell *et al.*, Lipids Reprogram Metabolism to Become a Major Carbon Source for  
730 Histone Acetylation. *Cell reports* **17**, 1463-1472 (2016).
- 731 25. M. Grabacka, M. Pierzchalska, M. Dean, K. Reiss, Regulation of Ketone Body Metabolism  
732 and the Role of PPARalpha. *International journal of molecular sciences* **17**, (2016).
- 733 26. P. Schönfeld, L. Wojtczak, Short- and medium-chain fatty acids in energy metabolism: the  
734 cellular perspective. *Journal of lipid research* **57**, 943-954 (2016).
- 735 27. R. K. A. Virk *et al.*, Disordered chromatin packing regulates phenotypic plasticity. *Sci Adv*  
736 **6**, eaax6232 (2020).
- 737 28. S. Yadav *et al.*, Abstract P2-02-06: Deregulated lipid metabolism fuels the genesis of  
738 estrogen receptor negative breast cancer. *Cancer Research* **79**, P2-02-06 (2019).
- 739 29. J. Whelan, K. Fritsche, Linoleic acid. *Adv Nutr* **4**, 311-312 (2013).
- 740 30. D. Ahel *et al.*, Poly(ADP-ribose)-dependent regulation of DNA repair by the chromatin  
741 remodeling enzyme ALC1. *Science* **325**, 1240-1243 (2009).
- 742 31. S. J. Guyenet, S. E. Carlson, Increase in adipose tissue linoleic acid of US adults in the last  
743 half century. *Adv Nutr* **6**, 660-664 (2015).
- 744 32. L. M. Almassalha *et al.*, Macrogenomic engineering via modulation of the scaling of  
745 chromatin packing density. *Nature biomedical engineering* **1**, 902-913 (2017).
- 746 33. L. M. Almassalha *et al.*, The Global Relationship between Chromatin Physical Topology,  
747 Fractal Structure, and Gene Expression. *Scientific reports* **7**, 41061-41061 (2017).
- 748 34. L. M. Almassalha *et al.*, The Greater Genomic Landscape: The Heterogeneous Evolution  
749 of Cancer. *Cancer Res* **76**, 5605-5609 (2016).
- 750 35. S. Yadav *et al.*, Abstract P3-02-07: Fatty acid metabolism is associated with chromatin  
751 remodeling in mammary epithelial cells. *Cancer Research* **80**, P3-02-07 (2020).



- 752 36. S. Heinz *et al.*, Simple combinations of lineage-determining transcription factors prime  
753 cis-regulatory elements required for macrophage and B cell identities. *Mol Cell* **38**, 576-  
754 589 (2010).
- 755 37. S. Steensels, B. A. Ersoy, Fatty acid activation in thermogenic adipose tissue. *Biochimica*  
756 *et biophysica acta. Molecular and cell biology of lipids* **1864**, 79-90 (2019).
- 757 38. E. J. O'Brien, J. M. Monk, B. O. Palsson, Using Genome-scale Models to Predict Biological  
758 Capabilities. *Cell* **161**, 971-987 (2015).
- 759 39. J. D. Orth, I. Thiele, B. O. Palsson, What is flux balance analysis? *Nat Biotechnol* **28**, 245-  
760 248 (2010).
- 761 40. S. Chandrasekaran *et al.*, Comprehensive Mapping of Pluripotent Stem Cell Metabolism  
762 Using Dynamic Genome-Scale Network Modeling. *Cell reports* **21**, 2965-2977 (2017).
- 763 41. C. Frezza *et al.*, Haem oxygenase is synthetically lethal with the tumour suppressor  
764 fumarate hydratase. *Nature* **477**, 225-228 (2011).
- 765 42. A. Mardinoglu *et al.*, Personal model-assisted identification of NAD(+) and glutathione  
766 metabolism as intervention target in NAFLD. *Mol Syst Biol* **13**, 916 (2017).
- 767 43. T. Shlomi, M. N. Cabili, M. J. Herrgard, B. O. Palsson, E. Ruppin, Network-based  
768 prediction of human tissue-specific metabolism. *Nat Biotechnol* **26**, 1003-1010 (2008).
- 769 44. K. Yizhak, B. Chaneton, E. Gottlieb, E. Ruppin, Modeling cancer metabolism on a genome  
770 scale. *Mol Syst Biol* **11**, 817 (2015).
- 771 45. N. C. Duarte *et al.*, Global reconstruction of the human metabolic network based on  
772 genomic and bibliomic data. *Proc Natl Acad Sci U S A* **104**, 1777-1782 (2007).
- 773 46. F. Shen, L. Boccuto, R. Pauly, S. Srikanth, S. Chandrasekaran, Genome-scale network  
774 model of metabolism and histone acetylation reveals metabolic dependencies of histone  
775 deacetylase inhibitors. *Genome Biol* **20**, 49 (2019).
- 776 47. A. Carrer *et al.*, Impact of a High-fat Diet on Tissue Acyl-CoA and Histone Acetylation  
777 Levels. *J Biol Chem* **292**, 3312-3322 (2017).
- 778 48. J. T. Li *et al.*, BCAT2-mediated BCAA catabolism is critical for development of pancreatic  
779 ductal adenocarcinoma. *Nat Cell Biol* **22**, 167-174 (2020).
- 780 49. S. J. Mentch *et al.*, Histone Methylation Dynamics and Gene Regulation Occur through  
781 the Sensing of One-Carbon Metabolism. *Cell Metab* **22**, 861-873 (2015).
- 782 50. K. Kerlikowske *et al.*, Risk Factors That Increase Risk of Estrogen Receptor-Positive and  
783 -Negative Breast Cancer. *J Natl Cancer Inst* **109**, (2017).
- 784 51. K. Li *et al.*, Risk prediction for estrogen receptor-specific breast cancers in two large  
785 prospective cohorts. *Breast Cancer Res* **20**, 147 (2018).
- 786 52. M. J. Worsham *et al.*, Multiplicity of benign breast lesions is a risk factor for progression  
787 to breast cancer. *Clin Cancer Res* **13**, 5474-5479 (2007).
- 788 53. O. Alonzo-Proulx, J. G. Mainprize, J. A. Harvey, M. J. Yaffe, Investigating the feasibility  
789 of stratified breast cancer screening using a masking risk predictor. *Breast Cancer Res* **21**,  
790 91 (2019).
- 791 54. A. S. Reiner *et al.*, Hormone receptor status of a first primary breast cancer predicts  
792 contralateral breast cancer risk in the WECARE study population. *Breast Cancer Res* **19**,  
793 83 (2017).
- 794 55. H. W. Smith *et al.*, An ErbB2/c-Src axis links bioenergetics with PRC2 translation to drive  
795 epigenetic reprogramming and mammary tumorigenesis. *Nat Commun* **10**, 2901 (2019).
- 796 56. M. E. Gonzalez *et al.*, Downregulation of EZH2 decreases growth of estrogen receptor-  
797 negative invasive breast carcinoma and requires BRCA1. *Oncogene* **28**, 843-853 (2009).

- 798 57. J. Wu, D. L. Crowe, The histone methyltransferase EZH2 promotes mammary stem and  
799 luminal progenitor cell expansion, metastasis and inhibits estrogen receptor-positive  
800 cellular differentiation in a model of basal breast cancer. *Oncol Rep* **34**, 455-460 (2015).
- 801 58. M. E. Gonzalez *et al.*, EZH2 expands breast stem cells through activation of NOTCH1  
802 signaling. *Proc Natl Acad Sci U S A* **111**, 3098-3103 (2014).
- 803 59. G. Dontu *et al.*, Role of Notch signaling in cell-fate determination of human mammary  
804 stem/progenitor cells. *Breast Cancer Res* **6**, R605-615 (2004).
- 805 60. V. Rodilla *et al.*, Luminal progenitors restrict their lineage potential during mammary gland  
806 development. *PLoS Biol* **13**, e1002069 (2015).
- 807 61. A. M. Lilja *et al.*, Clonal analysis of Notch1-expressing cells reveals the existence of  
808 unipotent stem cells that retain long-term plasticity in the embryonic mammary gland. *Nat*  
809 *Cell Biol* **20**, 677-687 (2018).
- 810 62. R. L. Milne *et al.*, Identification of ten variants associated with risk of estrogen-receptor-  
811 negative breast cancer. *Nat Genet* **49**, 1767-1778 (2017).
- 812 63. Y. Li, T. J. Dillon, M. Takahashi, K. T. Earley, P. J. Stork, Protein Kinase A-independent  
813 Ras Protein Activation Cooperates with Rap1 Protein to Mediate Activation of the  
814 Extracellular Signal-regulated Kinases (ERK) by cAMP. *J Biol Chem* **291**, 21584-21595  
815 (2016).
- 816 64. C. J. Creighton *et al.*, Activation of mitogen-activated protein kinase in estrogen receptor  
817 alpha-positive breast cancer cells in vitro induces an in vivo molecular phenotype of  
818 estrogen receptor alpha-negative human breast tumors. *Cancer Res* **66**, 3903-3911 (2006).
- 819 65. Z. T. Schafer *et al.*, Antioxidant and oncogene rescue of metabolic defects caused by loss  
820 of matrix attachment. *Nature* **461**, 109-113 (2009).
- 821 66. E. Piskounova *et al.*, Oxidative stress inhibits distant metastasis by human melanoma cells.  
822 *Nature* **527**, 186-191 (2015).
- 823 67. T. Wang *et al.*, JAK/STAT3-Regulated Fatty Acid beta-Oxidation Is Critical for Breast  
824 Cancer Stem Cell Self-Renewal and Chemoresistance. *Cell Metab* **27**, 136-150 e135  
825 (2018).
- 826 68. A. Dobin *et al.*, STAR: ultrafast universal RNA-seq aligner. *Bioinformatics* **29**, 15-21  
827 (2013).
- 828 69. B. Li, C. N. Dewey, RSEM: accurate transcript quantification from RNA-Seq data with or  
829 without a reference genome. *BMC Bioinformatics* **12**, 323 (2011).
- 830 70. M. I. Love, W. Huber, S. Anders, Moderated estimation of fold change and dispersion for  
831 RNA-seq data with DESeq2. *Genome Biology* **15**, 550 (2014).
- 832 71. Y. Zhou *et al.*, Metascape provides a biologist-oriented resource for the analysis of  
833 systems-level datasets. *Nat Commun* **10**, 1523 (2019).
- 834 72. S. Anders, P. T. Pyl, W. Huber, HTSeq – A Python framework to work with high-  
835 throughput sequencing data. *bioRxiv*, 002824 (2014).
- 836 73. M. Reich *et al.*, GenePattern 2.0. *Nat Genet* **38**, 500-501 (2006).
- 837 74. V. K. Mootha *et al.*, PGC-1 $\alpha$ -responsive genes involved in oxidative phosphorylation are  
838 coordinately downregulated in human diabetes. *Nature Genetics* **34**, 267-273 (2003).
- 839 75. A. Subramanian *et al.*, Gene set enrichment analysis: A knowledge-based approach for  
840 interpreting genome-wide expression profiles. *Proceedings of the National Academy of*  
841 *Sciences* **102**, 15545 (2005).
- 842 76. A. Ackermann, <ATAC-seqProtocolOmni-KaestnerLab.pdf>. (2019).

- 843 77. K. Miyamoto *et al.*, Chromatin Accessibility Impacts Transcriptional Reprogramming in  
844 Oocytes. *Cell reports* **24**, 304-311 (2018).
- 845 78. K. J. Livak, T. D. Schmittgen, Analysis of relative gene expression data using real-time  
846 quantitative PCR and the 2(-Delta Delta C(T)) Method. *Methods* **25**, 402-408 (2001).
- 847 79. S. A. Abdelmagid *et al.*, Comprehensive profiling of plasma fatty acid concentrations in  
848 young healthy Canadian adults. *PloS one* **10**, e0116195 (2015).
- 849 80. F. Shen, C. Cheek, S. Chandrasekaran, Dynamic Network Modeling of Stem Cell  
850 Metabolism. *Methods Mol Biol* **1975**, 305-320 (2019).

## 851 **Acknowledgments**

852 **General:** We would like to thank Professors Matthew D Hirschev and Neil Kelleher for advice  
853 regarding histone proteomics and, Jeannie Camarillo and the Northwestern Proteomics Core for  
854 conducting the histone proteomic analysis; The Northwest Metabolic Research Center (NW-MRC)  
855 at University of Washington for performing the lipidomics analysis; The Center for Medical  
856 Genomics at the Indiana University School of Medicine for RNA library preparation and RNA  
857 sequencing, and ATAC sequencing; The NU Seq Core facility for providing The Quant Studio 7  
858 Flex system; Natalie Pulliam for consenting patients and collecting tissue, and our many lab  
859 colleagues for feedback.

860 **Funding:** This work was supported by The Breast Cancer Research Foundation and the Bramsen-  
861 Hamill Foundation (S.A.K), and NIH grant # 1S10OD021562-01 (NW-MRC).

862 **Author contributions:** Conceptualization and project design: S.Y., S.E.C., and S.A.K.;  
863 experiments: S.Y ; Sequencing: X.X and H.G; RNA seq analysis : R.K.A.V., Z.Z., G.C and M.R.;  
864 ATAC Seq analysis: D.C.; PWS microscopy: D.V.D.; Metabolic flux analysis: C.H.C and S.C;  
865 Statistical Analysis: K.L.B ; writing (original draft): S.Y., S.E.C., and S.A.K.; writing (review and  
866 editing): V.B., S.C., and R.C.

867 **Competing interests:** The authors declare that they have no conflict of interests.

868 **Data and materials availability:** The datasets generated and analyzed during the current study  
869 are publicly available in the Gene Expression Omnibus: accession number GSE126799 (RNA-  
870 seq) and XXX (ATAC-seq)

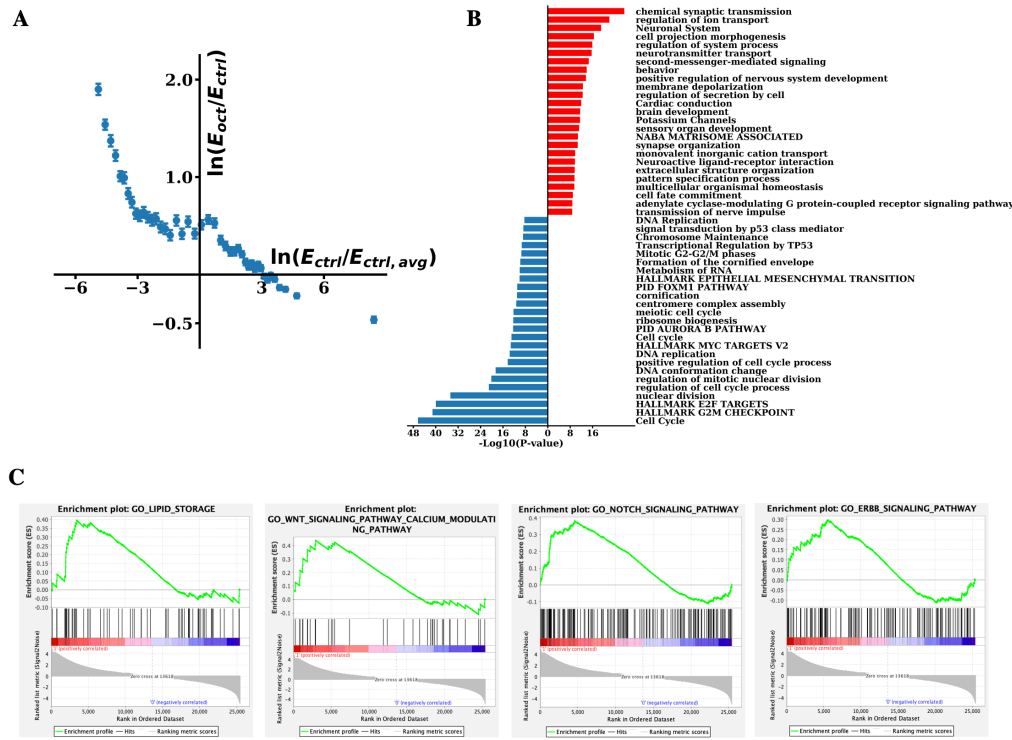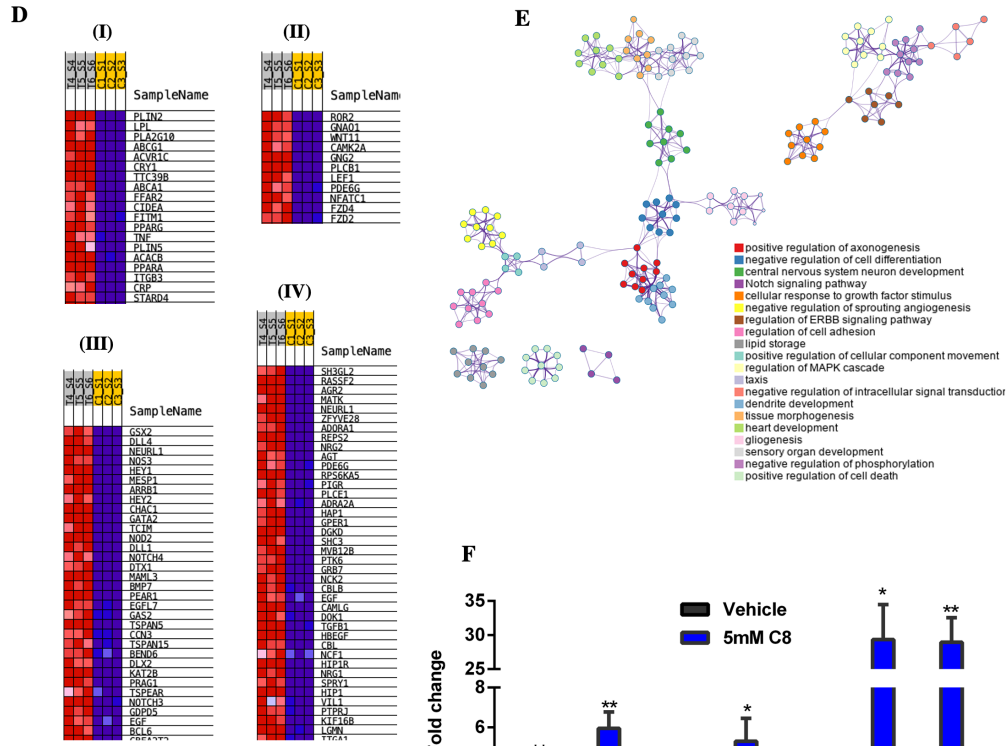

872 **Fig. 1. Lipid-rich environment enables transcriptional reprogramming in mammary**  
873 **epithelial cells.** (A) 24-hour treatment of MCF10A cells with 5mM octanoate results in a  
874 completely distinct transcriptional profile compared to untreated controls.  $E_{ctrl}$  is the expression  
875 of genes in the control condition across all 3 control replicates,  $E_{ctrl,avg}$  is the average expression  
876 for the control condition across all genes and replicates,  $E_{oct}$  is the expression of genes across all  
877 3 octanoate replicates.  $E_{ctrl}/E_{ctrl,avg}$  represents the ratio of expression of a particular gene to the  
878 average expression across all control cells. Thus, a positive value of  $\ln\left(\frac{E_{ctrl}}{E_{ctrl,avg}}\right)$  corresponds to  
879 genes that are highly expressed in the control conditions while a negative value of  $\ln\left(\frac{E_{ctrl}}{E_{ctrl,avg}}\right)$   
880 corresponds to genes that have an initial lower expression in the control condition.  $E_{oct}/E_{ctrl}$   
881 represents the ratio of expression of a particular gene for octanoate-treated versus vehicle control-  
882 treated cells. Genes with initially low expression are upregulated while genes with initially high  
883 expression are downregulated upon octanoate treatment. (B) Gene ontology analysis of  
884 differentially expressed genes induced by octanoate treatment. Upregulated and downregulated  
885 genes were first identified using DESeq2 (FDR < 0.01,  $|\log_{2}FC| = 2$ ) for 5mM octanoate treated  
886 cells compared to vehicle-treated control cells. Pathway enrichment analysis was performed on  
887 identified differentially expressed genes with annotations from online pathway databases (KEGG,  
888 Hallmark, Canonical Pathways, Reactome, BioCarta) and Gene Ontology Biological Processes.  
889 Pathway enrichment was ranked by p-value on a  $-\log_{10}$  scale and a selection from the top 25  
890 pathways associated with upregulated genes (in red) and downregulated genes (in blue) are shown.  
891 (C) GSEA analysis of Gene Ontology Biological Processes showing top pathways associated with  
892 octanoate treatment with FDR < 0.1 related to differentiation, cell signaling, and metabolic  
893 processes. (D) List of core enrichment genes differentially expressed in treated replicates -T4, T5,  
894 T6 versus control replicates- C1, C2, C3 (I) Lipid storage pathways (II) Wnt pathway (III) Notch

895 pathway (IV) ERBB pathway each pathway as identified by GSEA leading edge analysis. (E)  
896 Network analysis of pathways associated with the octanoate phenotype in GSEA analysis of Gene  
897 Ontology Biological Processes. (F) qPCR analysis of genes associated with the NOTCH pathway.  
898 Two genes, NOTCH3 and DLL4 show significant upregulation upon 5mM octanoate treatment  
899 compared to other identified genes such as NOTCH1. Statistical significance was determined by  
900 the unpaired t-test with Welch's correction.

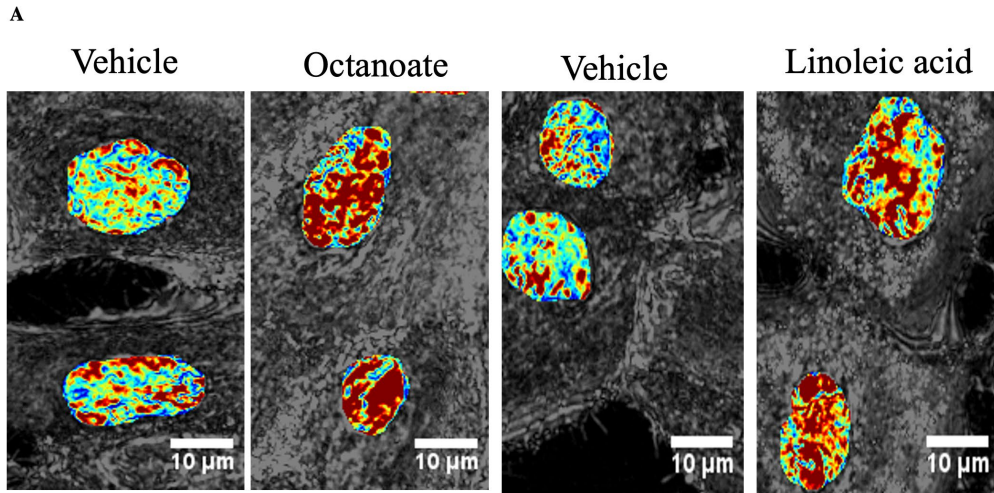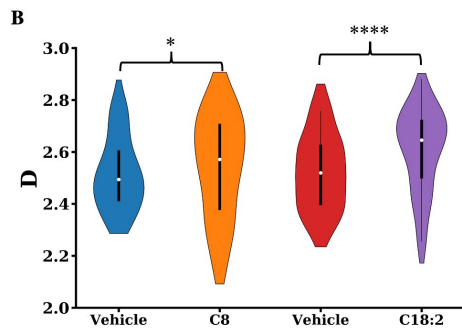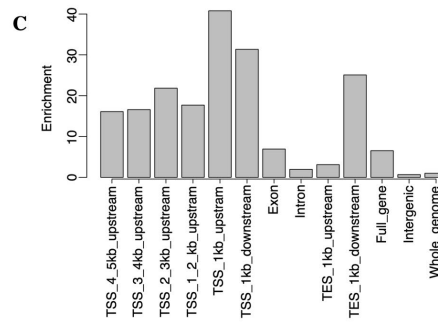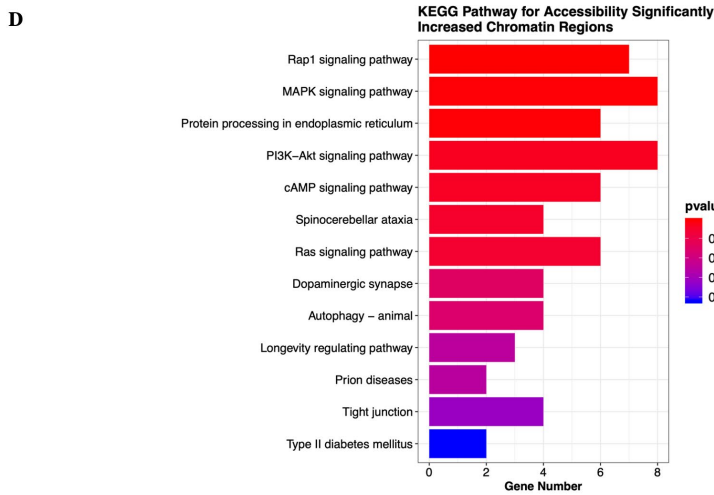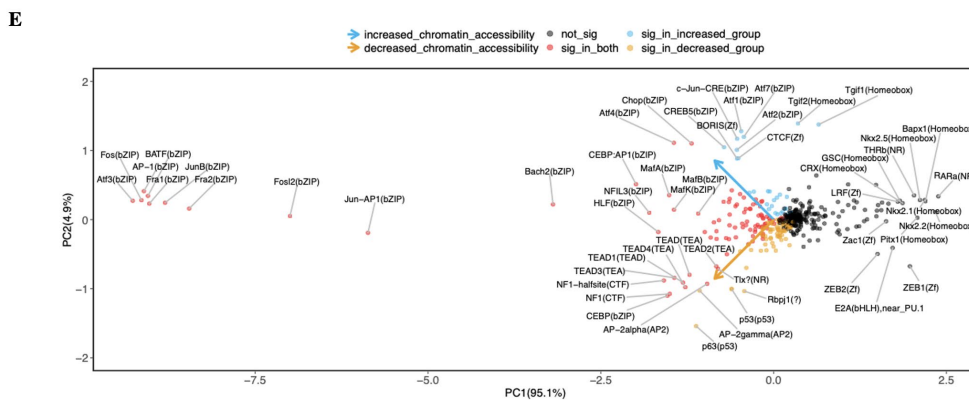



902 **Fig. 2. Linoleic acid alters large-scale chromatin packing behavior in MCF-10A cells.**

903 (A) Representative PWS microscopy images of MCF-10A cell nuclei at 24 hours after  
904 treatment with vehicle controls and lipids – octanoate and linoleic acid. Scale bars, 10 $\mu$ m.  
905 Chromatin packing scaling (*D*) map of nuclei shows an increase in chromatin packing  
906 scaling upon lipid treatment as demonstrated by an increase in red regions.

907 (B) Changes in average chromatin packing scaling among MCF-10A cells upon treatment with  
908 vehicle controls and lipids compared to untreated cells. Significance was determined using  
909 unpaired Kolmogorov-Smirnov *t*-test (\*\*\*\**P* < 0.0001, \**P* < 0.05). Bar graphs show the  
910 mean change in intranuclear *D* across cell populations for N = 88 cells PBS (vehicle for  
911 octanoate), N = 110 cells Octanoate (C8), N = 103 cells BSA (vehicle for linoleic acid),  
912 and N = 94 Linoleic acid (C18:2). (C) Enrichment of genomic locations for 1704 open  
913 chromatin regions (FDR < 0.05, logFC > 1) in LA treated MCF-10A cells. The enrichment  
914 of peaks in each type of genomic region relative to the whole genome is shown on the y-  
915 axis. Two ATAC-seq libraries were used for the analysis. (D) Pathway analysis for the  
916 regions with increased chromatin accessibility in linoleic acid treated cells identified using  
917 the KEGG database. (E) Biplot showing changes in chromatin accessibility for specific  
918 regions identified by HOMER analysis. Motifs with a significant increase in the chromatin  
919 accessibility are shown in blue and those with a significant decrease in accessibility are  
920 shown in yellow (FDR < 0.05 and |logFC| > 1).

921

922

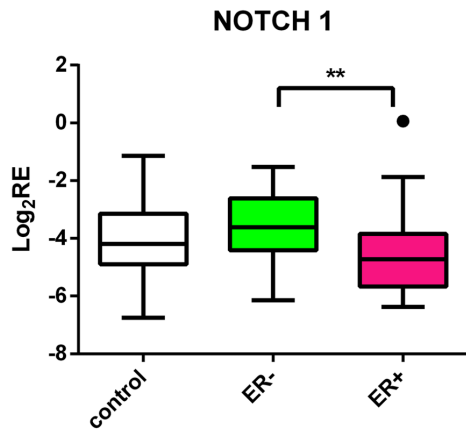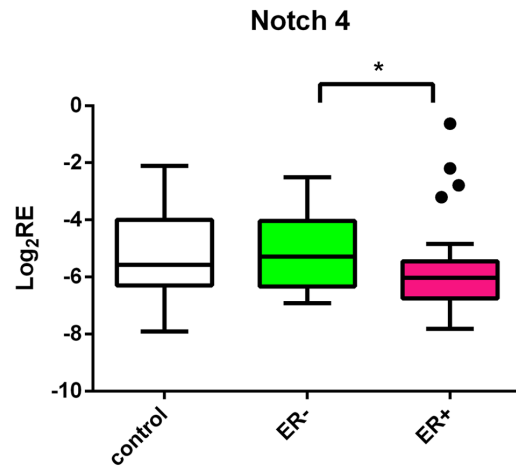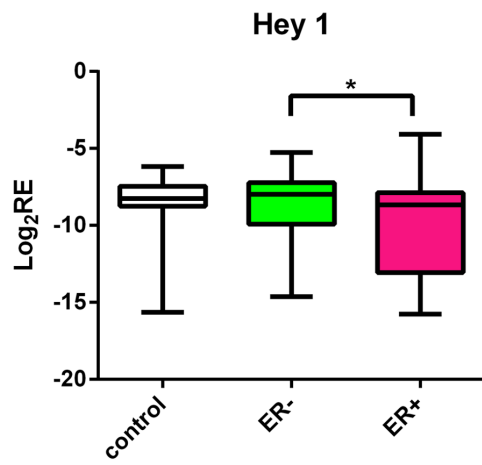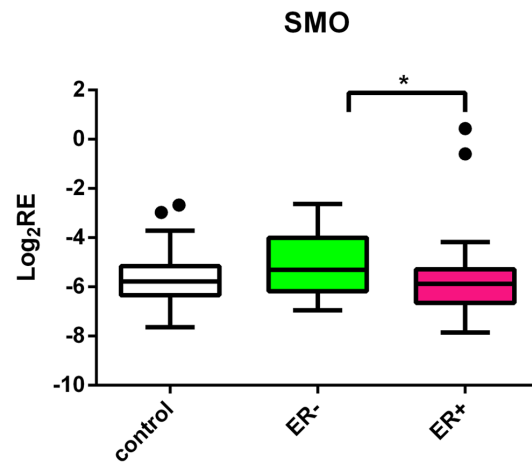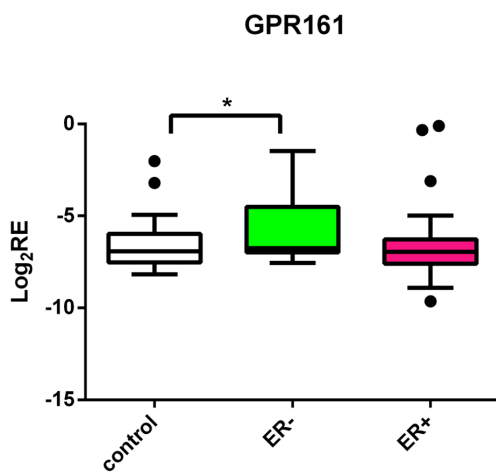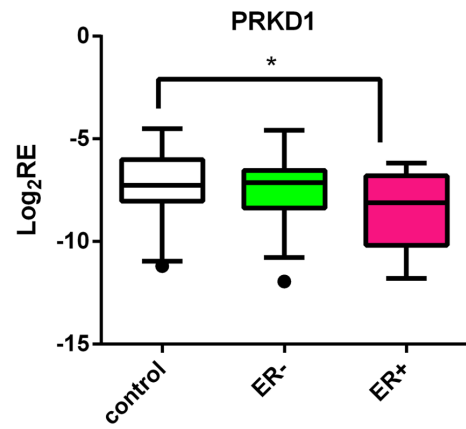

923

924

925 **Fig. 3. Notch pathway is overexpressed in CUB samples of patients at high risk of ER- disease**

926 Expression of genes from various pathways in matching CUBs from ER negative, ER positive  
927 patients and controls. The log<sub>2</sub>-transformed relative (log<sub>2</sub>RE) amounts of mRNA expression  
928 normalized to the housekeeping gene and expressed as  $\log_2 2^{-(CtX - CtGAPDH)} = -(CtX - CtGAPDH)$   
929 where Ct is threshold cycle and X is gene of interest. IGF2 and GPR161 were significantly higher  
930 in ER negative versus normal whereas ER positive showed significant increase in PRKD1 versus  
931 normal. Genes from the Notch pathway were significantly higher in ER negative CUBs in  
932 comparison to ER positive patients. Mann-Whitney test was used to test the pairwise differences  
933 between the samples (ER+, ER-, Control) \* p < 0.05; \*\*p < 0.01.

934

935

936

937

938

939

940

941

942

A

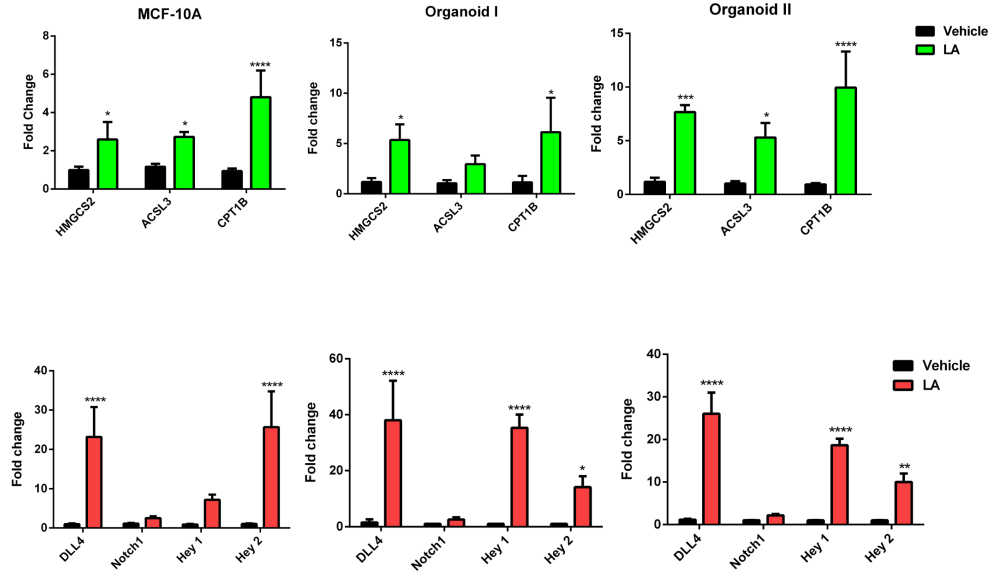

B

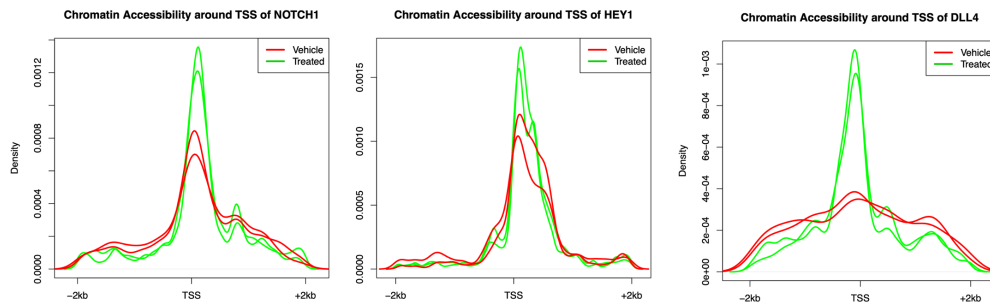

C

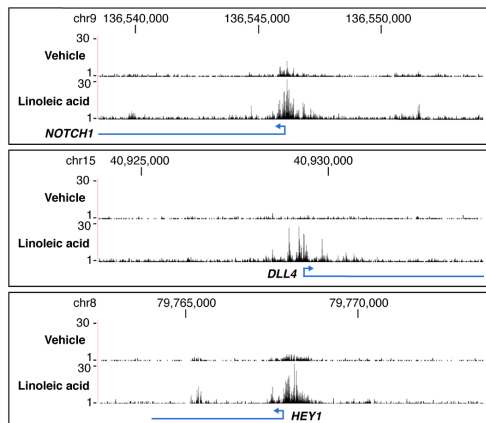

D

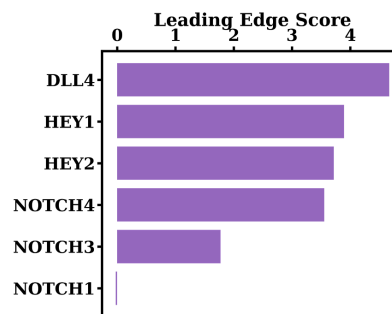

944 **Fig. 4. Increased DLL4/Notch signaling is associated with the stimulated fatty acid oxidation**

945 (A) qPCR data showing increase in lipid metabolism genes (green) and Notch pathway genes (red)  
946 after 24-hour linoleate treatment in MCF-10A and mammary organoids. Statistical significance  
947 was determined by the unpaired t-test with Welch's correction. (B) Chromatin accessibility in the  
948 lipid treated cells around the transcription start site (TSS) of NOTCH1, HEY1 and DLL4  
949 (FDR<0.001). (C) Gene tracks and increase in peaks for the Notch genes in LA treated cells with  
950 the exact location on the chromosome. (D) Leading edge scores for genes of interest associated  
951 with the NOTCH signaling pathway as determined by GSEA leading edge analysis. DLL4, HEY1,  
952 HEY2, NOTCH3, and NOTCH4 were identified as core enrichment genes in the NOTCH  
953 pathway.

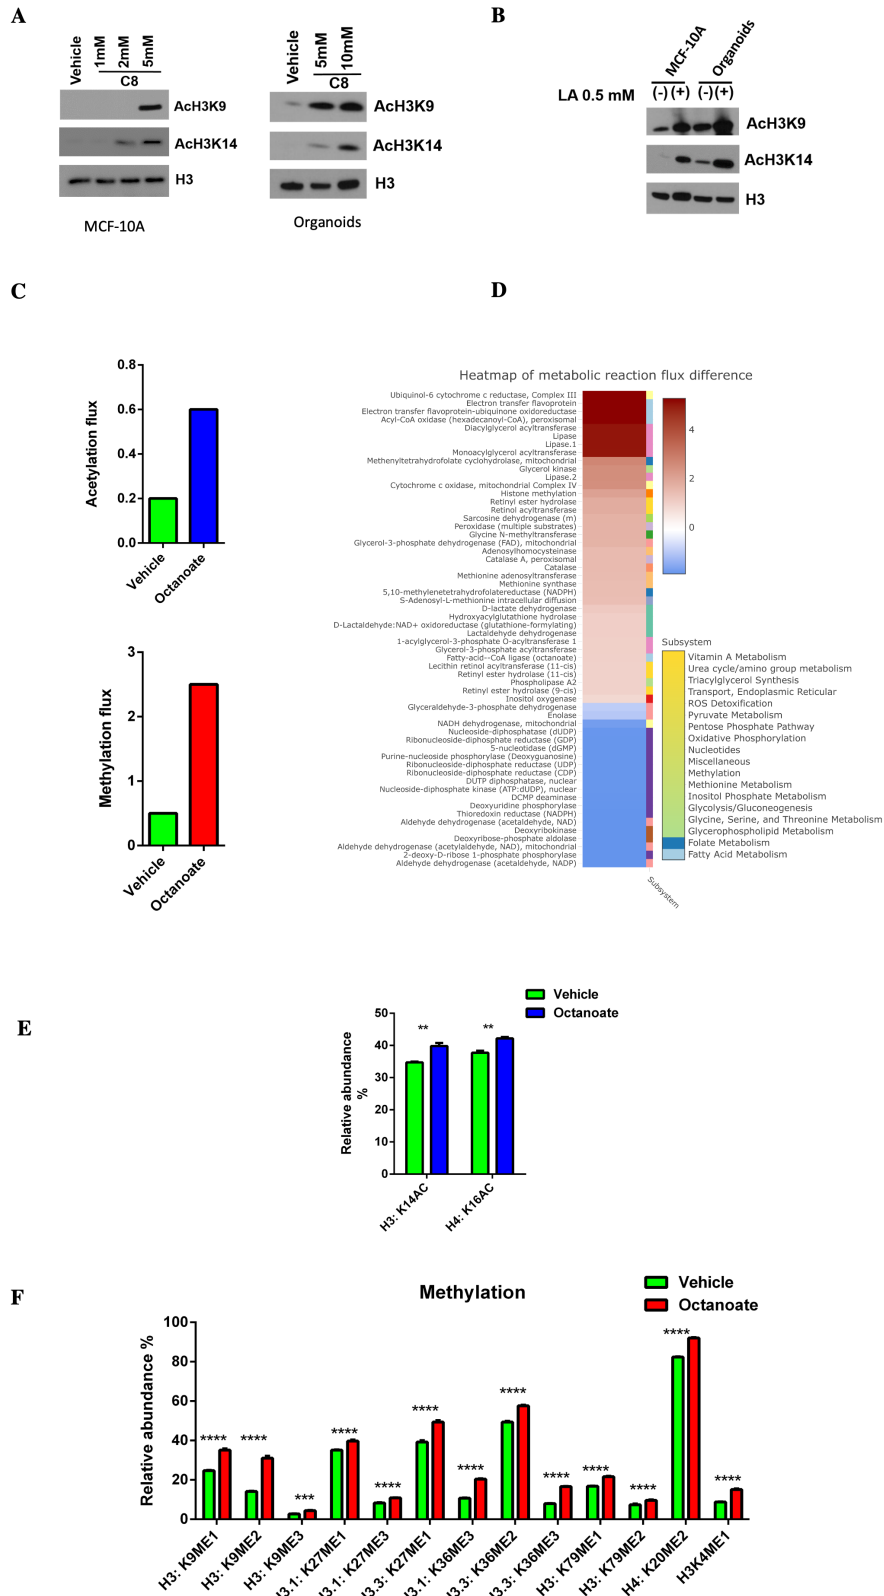

955 **Fig. 5. Fatty acids drive histone modifications and metabolic flux** Western blot of histone  
956 acetylation at H3 lysine K9 and K14 in MCF-10A cells and organoids treated with (A) octanoate  
957 and (B) linoleic acid. (C) The effect of octanoate treatment on histone acetylation and methylation  
958 flux in MCF-10A cells predicted using genome-scale metabolic modeling. (D) Heatmap of  
959 reaction flux differences predicted by metabolic modeling to be differentially active (p-value <  
960 0.01) between control and treatment. The corresponding pathways (subsystem) that each reaction  
961 belongs to is listed in the legend. Proteomic acetylation (E) and methylation (F) profiling measured  
962 by mass spectrometry of MCF-10A cells treated in triplicate with 5mM octanoate for 24 hours in  
963 a complete media compared to vehicle. Two-way ANOVA was performed to determine the  
964 statistical significance and corrected for multiple comparisons using Sidak test.

965

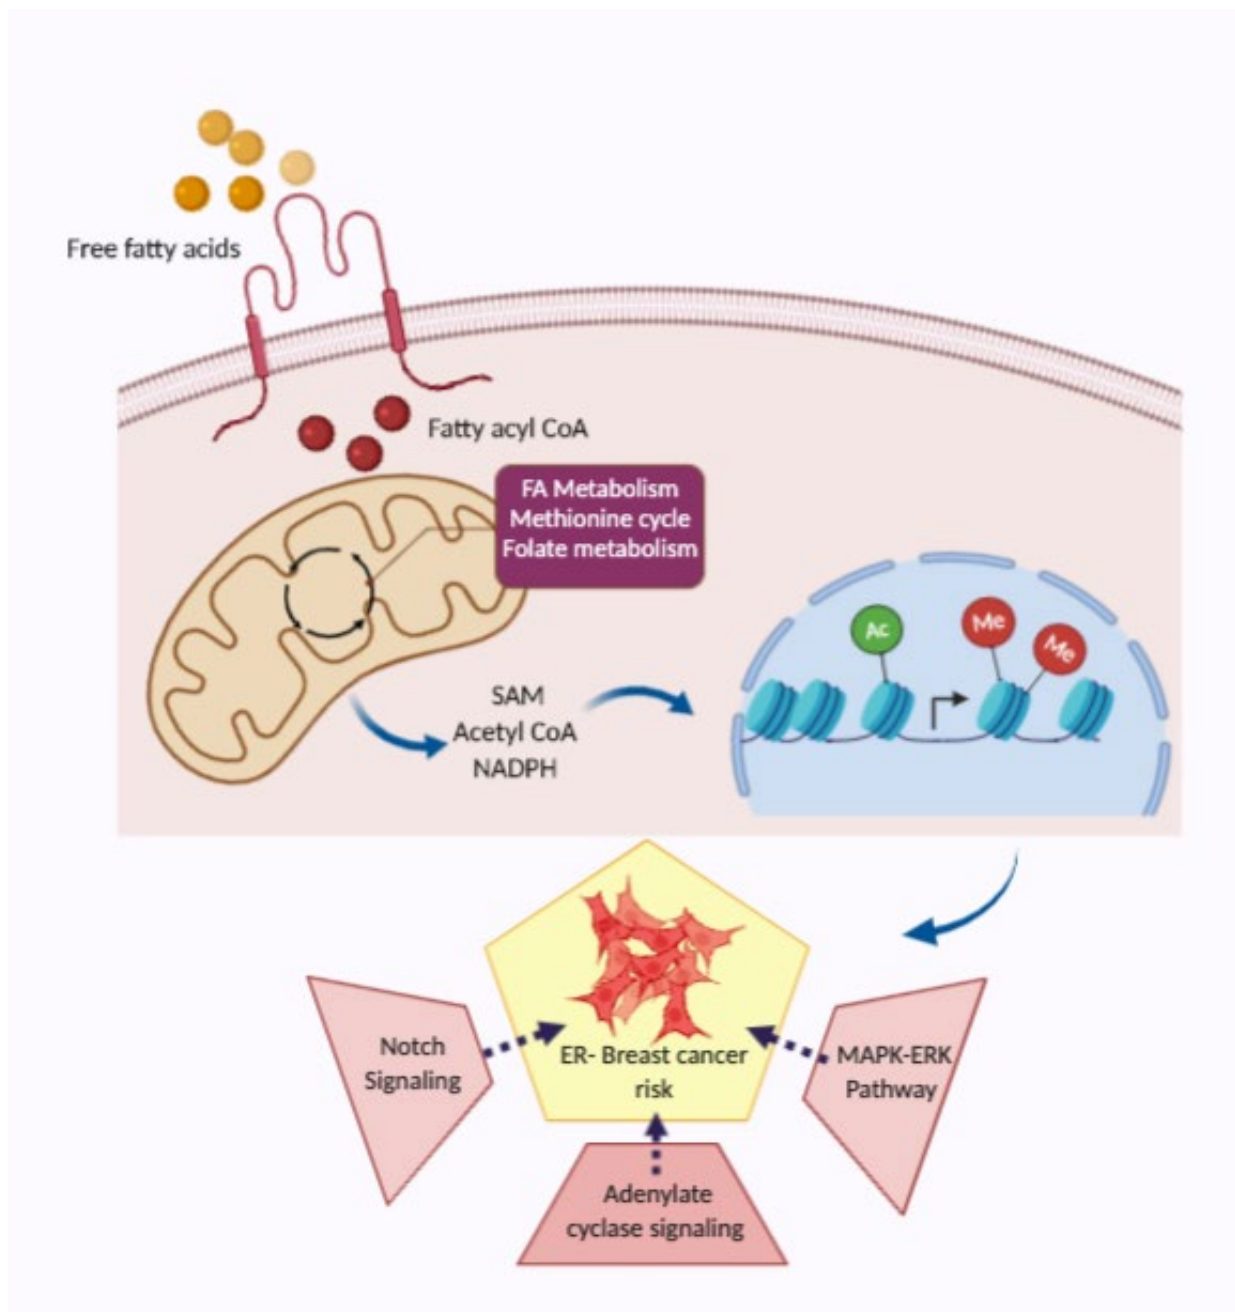

966

967 **Fig. 6. Proposed model illustrating the orchestration of lipid induced molecular changes**

968 *Sensors*: Senses the fatty acid rich environment and perturb cellular metabolism providing the

969 essential substrate for histone modifications and thereby turning on the *Mediators*- histone PTMs,

970 which consequently activates the *Effectors*- Notch, adenylate cyclase and MAPK-ERK the key

971 protein signaling associated with ER- breast cancer.



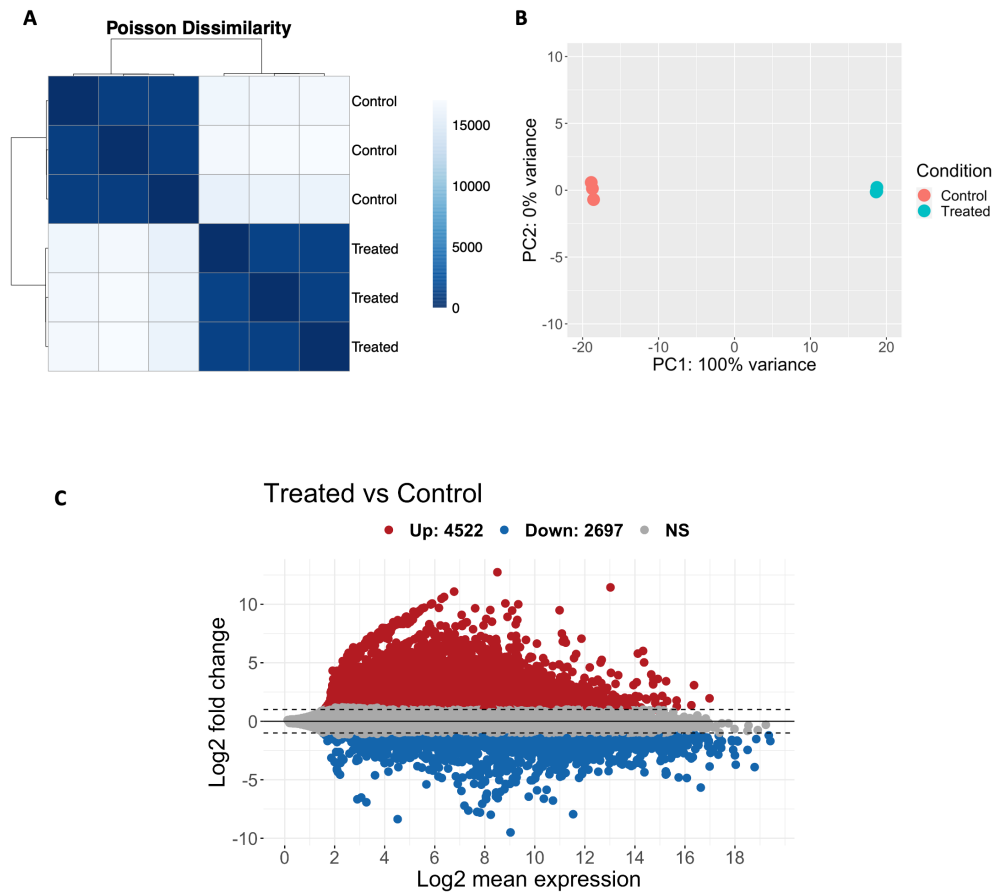

972

973 **Fig. S1** (A)Poisson distance clustering to overview the distribution of counts and clustering in the  
974 treated versus untreated group. Scalebar represents Poisson distance between samples. (B)  
975 Principal component analysis (PCA) of the DESeq2 analysis showing two distinct populations of  
976 control and treated group. PCA dimensionality reduction was performed on all samples. Almost  
977 100% of the variance is associated with the first principle component, which separates replicates  
978 in the vehicle and octanoate treatment conditions. (C) DESeq2 analysis showing 2131 upregulated  
979 genes and 632 downregulated genes for octanoate group compared with the vehicle with FDR  
980 cutoff = 0.01 and  $|\log_2 FC| \geq 2$ .

A

|                     | N                   | Overall Pop: (n=84) | ER+ Pop: (n=28) | ER- Pop: (n=28) | Control Pop: (n=28) |
|---------------------|---------------------|---------------------|-----------------|-----------------|---------------------|
| Age                 | Median              | 50                  | 51              | 50              | 50                  |
|                     | Range               | (34-65)             | (38-65)         | (34-63)         | (36-63)             |
| BMI                 | Median              | 26                  | 26              | 23              | 29                  |
|                     | Range               | (17-41)             | (18-40)         | (17-41)         | (21-41)             |
| ER (%)              | 0                   | 28 (33.33)          | 0               | 28 (100)        | 0                   |
|                     | 1                   | 28 (33.33)          | 28 (100)        | 0               | 0                   |
|                     | n/a                 | 28 (33.33)          | 0               | 0               | 28 (100)            |
| MenopauseStatus (%) | post                | 36 (42.86)          | 10 (35.71)      | 15 (53.57)      | 11 (39.29)          |
|                     | post (hysterectomy) | 13 (15.48)          | 7 (25)          | 1 (3.57)        | 5 (17.86)           |
|                     | post (medication)   | 5 (5.95)            | 1 (3.57)        | 2 (7.14)        | 2 (7.14)            |
|                     | pre                 | 1 (1.19)            | 0               | 1 (3.57)        | 0                   |
|                     | pre(1)              | 7 (8.33)            | 1 (3.57)        | 1 (3.57)        | 5 (17.86)           |
|                     | pre(2)              | 11 (13.1)           | 4 (14.29)       | 5 (17.86)       | 2 (7.14)            |
|                     | pre(3)              | 11 (13.1)           | 5 (17.86)       | 3 (10.71)       | 3 (10.71)           |
| MensmenoCode (%)    | Early_Follicular    | 7 (8.33)            | 1 (3.57)        | 1 (3.57)        | 5 (17.86)           |
|                     | Late_Follicular     | 11 (13.1)           | 4 (14.29)       | 5 (17.86)       | 2 (7.14)            |
|                     | Luteal              | 11 (13.1)           | 5 (17.86)       | 3 (10.71)       | 3 (10.71)           |
|                     | NA                  | 1 (1.19)            | 0               | 1 (3.57)        | 0                   |
|                     | Post_menopausal     | 54 (64.29)          | 18 (64.29)      | 18 (64.29)      | 18 (64.29)          |
| obcode (%)          | NA                  | 4 (4.76)            | 0               | 2 (7.14)        | 2 (7.14)            |
|                     | NW                  | 32 (38.1)           | 12 (42.86)      | 15 (53.57)      | 5 (17.86)           |
|                     | OB                  | 27 (32.14)          | 8 (28.57)       | 7 (25)          | 12 (42.86)          |
|                     | OW                  | 21 (25)             | 8 (28.57)       | 4 (14.29)       | 9 (32.14)           |
| Race (%)            | AA                  | 13 (15.48)          | 3 (10.71)       | 3 (10.71)       | 7 (25)              |
|                     | Cauc                | 70 (83.33)          | 24 (85.71)      | 25 (89.29)      | 21 (75)             |
|                     | Other               | 1 (1.19)            | 1 (3.57)        | 0               | 0                   |

B

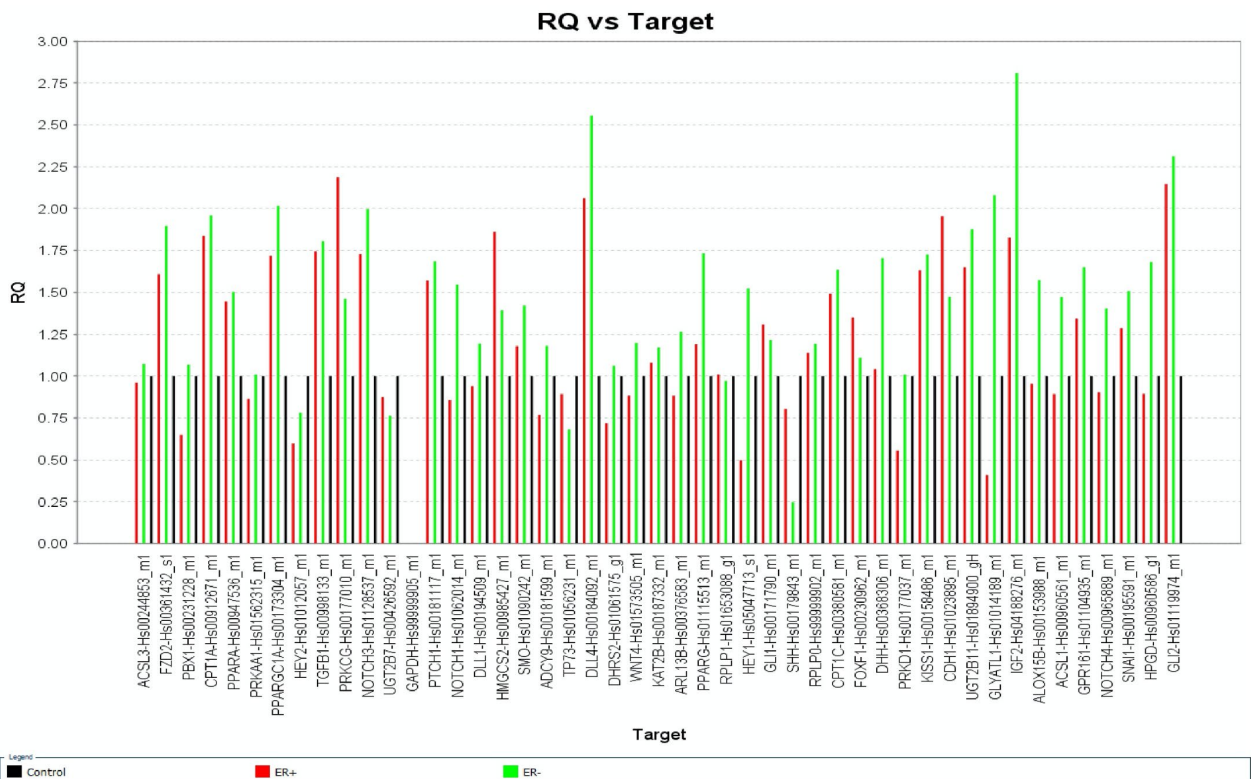

982 **Fig. S2** (A) The difference in age and BMI among three groups was analyzed by ANOVA with  
983 Sidak adjustment on pairwise comparison. The difference in menopausal status and race among  
984 three groups were analyzed using  $X^2$  test. The difference in HER2 status between ER1 and ER-  
985 group was analyzed using  $X^2$  test. (B) Histogram showing fold change or relative quantitation  
986 (RQ) for all genes of interest in the ER + (red) and ER- (green) in reference to the controls (black).

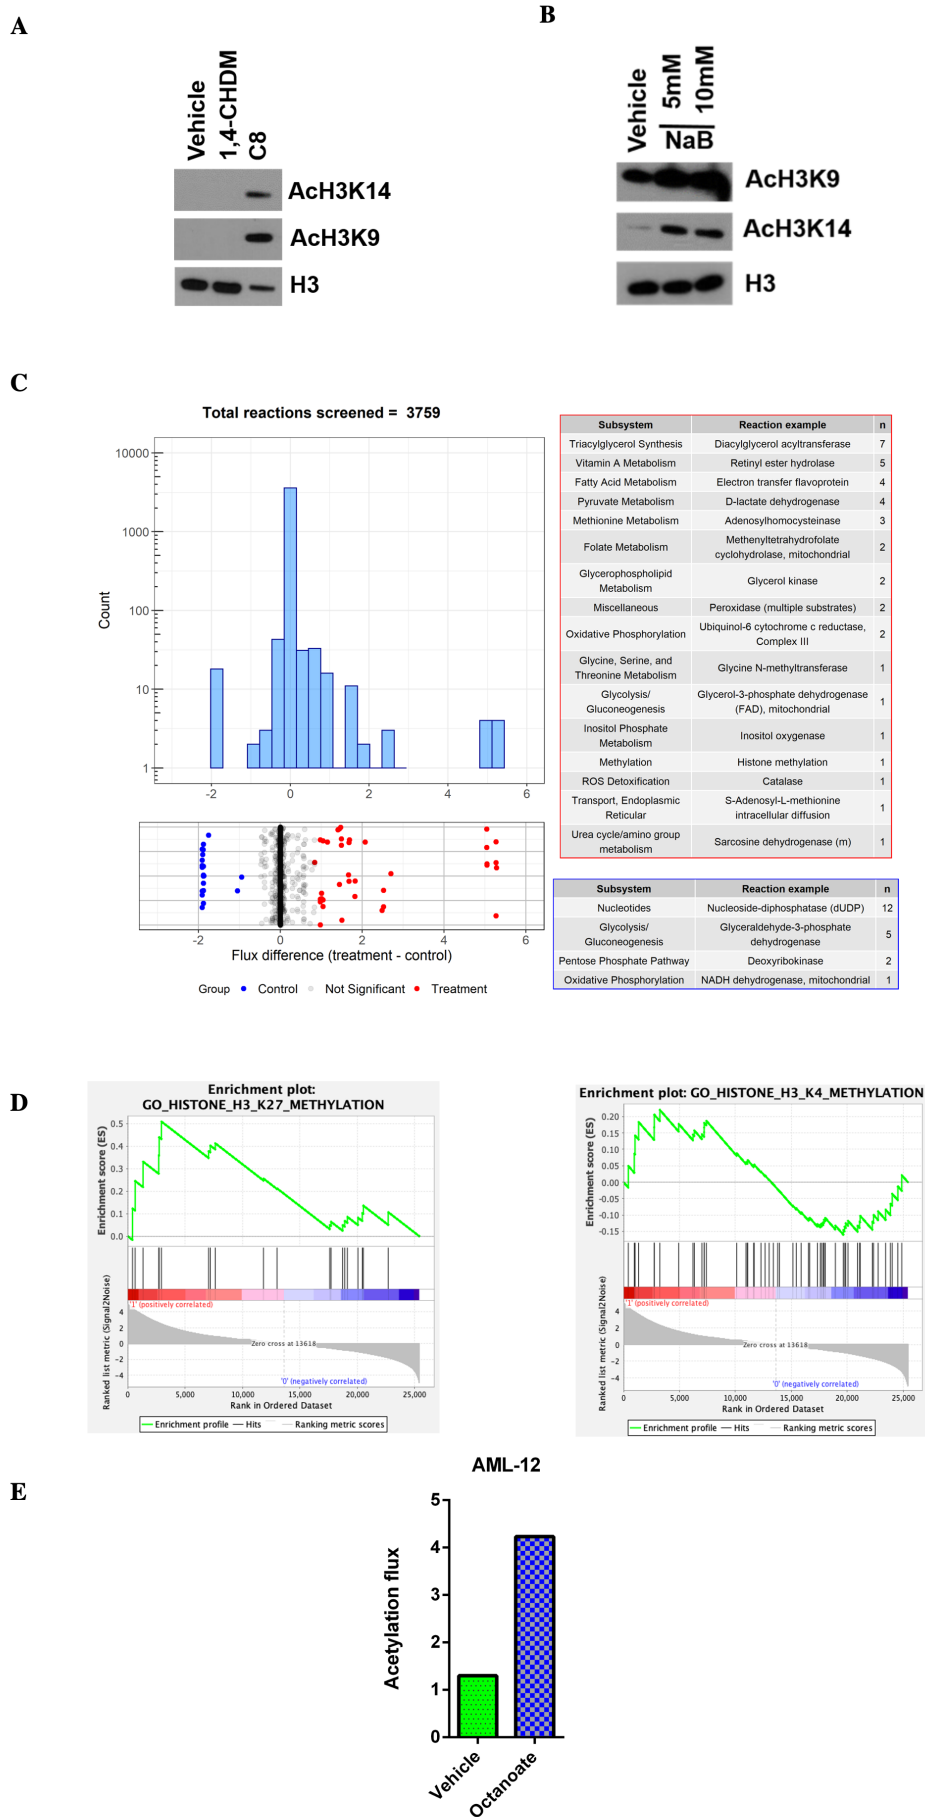

988 Figure S3: (A) To verify that the acetylation was specific to exposure to a fatty acid, MCF10A  
989 cells were exposed to 1,4-Cyclohexanedimethanol (1,4-CHDM), an alcohol with the same number  
990 of carbons, hydrogens and oxygens as octanoic acid. (B) Western blot of MCF-10A cells treated  
991 with HDAC inhibitor- sodium butyrate (NaB) 10mM for 24 hours to validate the specificity of the  
992 histone antibodies against the acetylated H3K9 and HK14.

993 (C) The histogram and scatter plot show the distribution of flux differences of all 3759 metabolic  
994 reactions in the model between octanoate treatment and control. The horizontal x-axis shows the  
995 difference in flux of each reaction, while the y-axis of the histogram shows the total number of  
996 reactions in each bin. Metabolic pathways and representative reactions that showed the greatest  
997 differences in flux ( $p$ -value  $< 0.01$ ) between the treatment and control are highlighted in the scatter  
998 plot and listed in the table. (D) GSEA analysis showing H3K27 and H3K4 enrichment in octanoate  
999 treated cells with corresponding leading-edge genes. (E) Predicted acetylation flux in octanoate  
1000 treated AML-12 cells using FBA model.
